# Supplementary material
Source: HighWire-hosted journal article supplement (https://bmjopen.bmj.com/content/7/7/e016206)
Supplement: inline-supplementary-material-1 [file inline-supplementary-material-1.pdf]

## Appendix1: List of identified healthcare technologies

| Report name (year) | Intention of the study | Technology Name                                                       | Tech. time frame | Purpose of the technology                        | Specialty                    | Technology type                 |
|--------------------|------------------------|-----------------------------------------------------------------------|------------------|--------------------------------------------------|------------------------------|---------------------------------|
| BT Calendar 1997   | Commercial             | Artificial muscle use in place of heart transplants                   | 1                | Treatment and management of symptoms and disease | IX - circulation             | Regenerative medicine           |
| BT Calendar 1997   | Commercial             | Telemed link to home with home blood test kit                         | 1                | Diagnosis and monitoring of disease              | Other - generic              | IT systems, eHealth and mHealth |
| BT Calendar 1997   | Commercial             | Artificial intelligence based elderly and handicapped support devices | 1                | Rehabilitation                                   | XXI - screening, rehab       | Assistive devices               |
| BT Calendar 1997   | Commercial             | Artificial pancreas                                                   | 1                | Treatment and management of symptoms and disease | XI - GI tract, dental health | Regenerative medicine           |
| BT Calendar 1997   | Commercial             | Artificial blood                                                      | 3                | Treatment and management of symptoms and disease | III - blood                  | Regenerative medicine           |
| BT Calendar 1997   | Commercial             | Disability assistance devices using thought recognition               | 3                | Rehabilitation                                   | XXI - screening, rehab       | Assistive devices               |
| BT Calendar 1997   | Commercial             | Artificial ears                                                       | 3                | Rehabilitation                                   | VIII - ear                   | Regenerative medicine           |
| BT Calendar 1997   | Commercial             | Electronic implants used to stimulate muscles in disabled people      | 5                | Rehabilitation                                   | XIII - musculoskeletal       | Devices and biomaterials        |
| BT Calendar 1997   | Commercial             | Home (health) diagnostic systems, daily/real time check-up            | 1                | Diagnosis and monitoring of disease              | Other - generic              | IT systems, eHealth and mHealth |
| BT Calendar 1997   | Commercial             | Virtual Reality based exercisers in homes                             | 1                | Health promotion and prevention of disease       | XXI - screening, rehab       | IT systems, eHealth and mHealth |
| BT Calendar 1997   | Commercial             | Synthetic retinal implants for simple vision                          | 8                | Rehabilitation                                   | VII - eye                    | Regenerative medicine           |
| BT Calendar 1997   | Commercial             | Personal wearable health monitor                                      | 6                | Health promotion and prevention of disease       | XXI - screening, rehab       | IT systems, eHealth and mHealth |
| BT Calendar 1997   | Commercial             | Artificial heart                                                      | 13               | Treatment and management of symptoms and disease | IX - circulation             | Regenerative medicine           |

## Appendix1: List of identified healthcare technologies

|                  |            |                                                            |    |                                                  |                              |                          |
|------------------|------------|------------------------------------------------------------|----|--------------------------------------------------|------------------------------|--------------------------|
| BT Calendar 1997 | Commercial | Genetic screening widely used                              | 10 | Health promotion and prevention of disease       | XXI - screening, rehab       | Population programmes    |
| BT Calendar 1997 | Commercial | Fine particle beam gene engineering                        | 12 | Treatment and management of symptoms and disease | Other - generic              | Regenerative medicine    |
| BT Calendar 1997 | Commercial | Artificial senses, sensors directly stimulating nerves     | 15 | Rehabilitation                                   | XXI - screening, rehab       | Devices and biomaterials |
| BT Calendar 1997 | Commercial | Prevention of cancer                                       | 16 | Health promotion and prevention of disease       | II - cancers                 | Population programmes    |
| BT Calendar 1997 | Commercial | Custom foods for particular medical conditions will exist. | 13 | Treatment and management of symptoms and disease | Other - generic              | Other                    |
| BT Calendar 1997 | Commercial | Genetic programs to enhance human well-being               | 23 | Health promotion and prevention of disease       | V - mental health            | Population programmes    |
| BT Calendar 1997 | Commercial | Artificial lungs                                           | 18 | Treatment and management of symptoms and disease | X - respiratory              | Regenerative medicine    |
| BT Calendar 1997 | Commercial | Artificial kidneys                                         | 18 | Treatment and management of symptoms and disease | XIV - genitourinary          | Regenerative medicine    |
| BT Calendar 1997 | Commercial | Artificial brain cells                                     | 20 | Treatment and management of symptoms and disease | VI - nervous                 | Regenerative medicine    |
| BT Calendar 1997 | Commercial | Artificial liver                                           | 23 | Treatment and management of symptoms and disease | XI - GI tract, dental health | Regenerative medicine    |
| BT Calendar 1997 | Commercial | Extension of average lifespan to over 100                  | 23 | Health promotion and prevention of disease       | XXI - screening, rehab       | Unknown                  |
| BT Calendar 1997 | Commercial | Artificial brain implants                                  | 28 | Treatment and management of symptoms and disease | VI - nervous                 | Regenerative medicine    |
| BT Calendar 1997 | Commercial | Artificial peripheral nerves                               | 28 | Treatment and management of symptoms and disease | VI - nervous                 | Regenerative medicine    |
| BT Calendar 1997 | Commercial | Artificial legs                                            | 33 | Rehabilitation                                   | XXI - screening, rehab       | Unknown                  |

## Appendix1: List of identified healthcare technologies

|                  |            |                                                                           |    |                                                                         |                              |                                   |
|------------------|------------|---------------------------------------------------------------------------|----|-------------------------------------------------------------------------|------------------------------|-----------------------------------|
| BT Calendar 1997 | Commercial | Fully functional artificial eyes                                          | 33 | Treatment and management of symptoms and disease                        | VII - eye                    | Regenerative medicine             |
| BT Calendar 2005 | Commercial | laser activated drug capsules                                             | 3  | Treatment and management of symptoms and disease                        | Other - generic              | drugs (not prophylactic vaccines) |
| BT Calendar 2005 | Commercial | ultrasound or radio activated capsules                                    | 3  | Treatment and management of symptoms and disease                        | Other - generic              | drugs (not prophylactic vaccines) |
| BT Calendar 2005 | Commercial | blood analysis chips                                                      | 3  | Diagnosis and monitoring of disease                                     | Other - generic              | Diagnostic tests and imaging      |
| BT Calendar 2005 | Commercial | e-Baybies electronic conception                                           | 5  | Health promotion and prevention of disease                              | XXI - screening, rehab       | Unknown                           |
| BT Calendar 2005 | Commercial | Instant electronic identification of pathogens                            | 5  | Diagnosis and monitoring of disease                                     | I - infections               | Diagnostic tests and imaging      |
| BT Calendar 2005 | Commercial | Online surgeries dominate first line medical care                         | 5  | Supporting the provision of care and/or increasing service efficiency   | Other - generic              | IT systems, eHealth and mHealth   |
| BT Calendar 2005 | Commercial | active skin                                                               | 5  | Unknown                                                                 | XII - skin                   | Unknown                           |
| BT Calendar 2005 | Commercial | Cyber-drugs (electronically activated drugs)                              | 5  | Treatment and management of symptoms and disease                        | Other - generic              | Drugs (not prophylactic vaccines) |
| BT Calendar 2005 | Commercial | automated pain relief for soldiers                                        | 5  | Treatment and management of symptoms and disease                        | XIX - injury                 | Devices and biomaterials          |
| BT Calendar 2005 | Commercial | bacteria in toothpaste to attack plaque                                   | 5  | Health promotion and prevention of disease                              | XI - GI tract, dental health | Non-surgical therapy              |
| BT Calendar 2005 | Commercial | e-baybies, binary conception                                              | 5  | Health promotion and prevention of disease                              | XXI - screening, rehab       | Unknown                           |
| BT Calendar 2005 | Commercial | hand-held scanner to detect tumours using tissue resonance interferometer | 5  | Diagnosis and monitoring of disease                                     | II - cancers                 | Diagnostic tests and imaging      |
| BT Calendar 2005 | Commercial | smart pill bottles remotely monitor medication taking and use alarms      | 5  | Supporting patients receiving care (designed to be used by individuals) | Other - generic              | IT systems, eHealth and mHealth   |

## Appendix1: List of identified healthcare technologies

|                  |            |                                                                                 |    |                                                  |                              |                                   |
|------------------|------------|---------------------------------------------------------------------------------|----|--------------------------------------------------|------------------------------|-----------------------------------|
| BT Calendar 2005 | Commercial | diabetes cure via stem cell research                                            | 5  | Treatment and management of symptoms and disease | IV - endocrine               | Regenerative medicine             |
| BT Calendar 2005 | Commercial | Use of human's own tissues to grow replacement organs                           | 8  | Treatment and management of symptoms and disease | Other - generic              | Regenerative medicine             |
| BT Calendar 2005 | Commercial | Artificial senses                                                               | 8  | Rehabilitation                                   | XXI - screening, rehab       | Devices and biomaterials          |
| BT Calendar 2005 | Commercial | context sensitive cyber drugs                                                   | 8  | Treatment and management of symptoms and disease | Other - generic              | Unknown                           |
| BT Calendar 2005 | Commercial | electronic stimulation of brain sensations as recreational substitute for drugs | 8  | Other                                            | VI - nervous                 | Devices and biomaterials          |
| BT Calendar 2005 | Commercial | Custom (GM) foods for particular medical conditions will exist.                 | 8  | Treatment and management of symptoms and disease | Other - generic              | Other                             |
| BT Calendar 2005 | Commercial | Gene-gel stimulation of re-growth of natural teeth on demand                    | 8  | Treatment and management of symptoms and disease | XI - GI tract, dental health | drugs (not prophylactic vaccines) |
| BT Calendar 2005 | Commercial | retina regeneration using foetal retinal cell injection                         | 8  | Treatment and management of symptoms and disease | VII - eye                    | Regenerative medicine             |
| BT Calendar 2005 | Commercial | tooth regeneration                                                              | 8  | Treatment and management of symptoms and disease | XI - GI tract, dental health | Regenerative medicine             |
| BT Calendar 2005 | Commercial | plastic bones                                                                   | 8  | Treatment and management of symptoms and disease | XIII - musculoskeletal       | Devices and biomaterials          |
| BT Calendar 2005 | Commercial | emotionally specific drugs                                                      | 8  | Unknown                                          | V - mental health            | drugs (not prophylactic vaccines) |
| BT Calendar 2005 | Commercial | synthetic organs by printing layers of cells                                    | 10 | Treatment and management of symptoms and disease | Other - generic              | Regenerative medicine             |
| BT Calendar 2005 | Commercial | synthetic viruses                                                               | 10 | Unknown                                          | I -                          | Other                             |

## Appendix1: List of identified healthcare technologies

|                  |            |                                                                |    |                                                  |                              |                                   |
|------------------|------------|----------------------------------------------------------------|----|--------------------------------------------------|------------------------------|-----------------------------------|
|                  |            |                                                                |    |                                                  | infections                   |                                   |
| BT Calendar 2005 | Commercial | sensory augmentation using sensory implants, nanoparticles etc | 10 | Rehabilitation                                   | VI - nervous                 | Devices and biomaterials          |
| BT Calendar 2005 | Commercial | use of stem cells in brain after strokes or accidents          | 10 | Treatment and management of symptoms and disease | VI - nervous                 | Regenerative medicine             |
| BT Calendar 2005 | Commercial | gene therapy generates new hair cells in humans                | 10 | Treatment and management of symptoms and disease | XII - skin                   | drugs (not prophylactic vaccines) |
| BT Calendar 2005 | Commercial | artificial sensors used in cosmetic upgrade surgery            | 13 | Treatment and management of symptoms and disease | Other - generic              | Devices and biomaterials          |
| BT Calendar 2005 | Commercial | Electronic memory enhancement                                  | 20 | Unknown                                          | Other - generic              | Unknown                           |
| BT Calendar 2005 | Commercial | Nanobots in toothpaste attack plaque                           | 20 | Health promotion and prevention of disease       | XI - GI tract, dental health | drugs (not prophylactic vaccines) |
| BT Calendar 2005 | Commercial | Fully functioning artificial eyes                              | 20 | Treatment and management of symptoms and disease | VII - eye                    | Regenerative medicine             |
| BT Calendar 2005 | Commercial | electronic brain implants                                      | 20 | Treatment and management of symptoms and disease | VI - nervous                 | Devices and biomaterials          |
| BT Calendar 2005 | Commercial | Intelligence or memory enhancement by external means           | 20 | Unknown                                          | Other - generic              | Unknown                           |
| BT Calendar 2005 | Commercial | e-baybies, genetic conception                                  | 20 | Health promotion and prevention of disease       | XXI - screening, rehab       | Unknown                           |
| BT Calendar 2005 | Commercial | synthetic immune system                                        | 20 | Treatment and management of symptoms and disease | III - blood                  | Regenerative medicine             |
| BT Calendar 2005 | Commercial | Artificial peripheral nerves                                   | 30 | Treatment and management of symptoms and disease | VI - nervous                 | Regenerative medicine             |
| BT Calendar 2005 | Commercial | e-baybies, digital emulation conception                        | 30 | Health promotion and prevention of disease       | XXI - screening, rehab       | Unknown                           |

## Appendix1: List of identified healthcare technologies

|                  |            |                                                                                    |   |                                                                         |                 |                                 |
|------------------|------------|------------------------------------------------------------------------------------|---|-------------------------------------------------------------------------|-----------------|---------------------------------|
| BT Calendar 2005 | Commercial | Electronic prescriptions reduce fraud and improve speed                            | 3 | Supporting the provision of care and/or increasing service efficiency   | Other - generic | IT systems, eHealth and mHealth |
| BT Calendar 2005 | Commercial | 24/7 blood chemistry monitoring                                                    | 3 | Diagnosis and monitoring of disease                                     | Other - generic | Diagnostic tests and imaging    |
| BT Calendar 2005 | Commercial | supermarkets used as major source of medical alerts                                | 3 | Health promotion and prevention of disease                              | Other - generic | Other                           |
| BT Calendar 2005 | Commercial | Expert systems used extensively in GP surgeries                                    | 5 | Supporting patients receiving care (designed to be used by individuals) | Other - generic | IT systems, eHealth and mHealth |
| BT Calendar 2005 | Commercial | Hospitals use virtual queuing systems                                              | 5 | Supporting the provision of care and/or increasing service efficiency   | Other - generic | IT systems, eHealth and mHealth |
| BT Calendar 2005 | Commercial | Neural networks used for patient appointment management                            | 5 | Supporting the provision of care and/or increasing service efficiency   | Other - generic | IT systems, eHealth and mHealth |
| BT Calendar 2005 | Commercial | Multimedia patient records                                                         | 5 | Supporting patients receiving care (designed to be used by individuals) | Other - generic | IT systems, eHealth and mHealth |
| BT Calendar 2005 | Commercial | Lifestyle monitoring and insurance linked to medical records                       | 5 | Health promotion and prevention of disease                              | Other - generic | Population programmes           |
| BT Calendar 2005 | Commercial | antibacterial coatings on domestic appliances, phones etc, especially in hospitals | 5 | Health promotion and prevention of disease                              | I - infections  | Devices and biomaterials        |
| BT Calendar 2005 | Commercial | flexible displays used for body monitoring and alerts                              | 5 | Diagnosis and monitoring of disease                                     | Other - generic | IT systems, eHealth and mHealth |
| BT Calendar 2005 | Commercial | emotion alerts                                                                     | 5 | Health promotion and prevention of disease                              | Other - generic | Devices and biomaterials        |
| BT Calendar 2005 | Commercial | (drug shortages caused by) internet diagnosis                                      | 5 | Diagnosis and monitoring of disease                                     | Other - generic | IT systems, eHealth and mHealth |

## Appendix1: List of identified healthcare technologies

|                  |            |                                                                   |   |                                                                         |                        |                                 |
|------------------|------------|-------------------------------------------------------------------|---|-------------------------------------------------------------------------|------------------------|---------------------------------|
| BT Calendar 2005 | Commercial | MRSA detection chips on sale in high street                       | 5 | Diagnosis and monitoring of disease                                     | I - infections         | Population programmes           |
| BT Calendar 2005 | Commercial | Devices roaming within blood vessels under own power              | 8 | Unknown                                                                 | Other - generic        | Devices and biomaterials        |
| BT Calendar 2005 | Commercial | Operations videoed and stored as part of medical record           | 8 | Supporting patients receiving care (designed to be used by individuals) | Other - generic        | IT systems, eHealth and mHealth |
| BT Calendar 2005 | Commercial | Direct electronic pleasure production                             | 8 | Other                                                                   | V - mental health      | IT systems, eHealth and mHealth |
| BT Calendar 2005 | Commercial | Orgasm by email                                                   | 8 | Supporting patients receiving care (designed to be used by individuals) | XIV - genitourinary    | IT systems, eHealth and mHealth |
| BT Calendar 2005 | Commercial | Artificial senses, sensors directly stimulating nerves            | 8 | Rehabilitation                                                          | XXI - screening, rehab | Devices and biomaterials        |
| BT Calendar 2005 | Commercial | Smart membranes for remote control of drug injection              | 8 | Treatment and management of symptoms and disease                        | Other - generic        | Devices and biomaterials        |
| BT Calendar 2005 | Commercial | Domestic bacterial detection devices                              | 8 | Health promotion and prevention of disease                              | I - infections         | Diagnostic tests and imaging    |
| BT Calendar 2005 | Commercial | Micro-fluidic chips used for gene sequencing in every GP surgery  | 8 | Diagnosis and monitoring of disease                                     | Other - generic        | Diagnostic tests and imaging    |
| BT Calendar 2005 | Commercial | Self certification for prescriptions using electronic diagnostics | 8 | Supporting patients receiving care (designed to be used by individuals) | Other - generic        | IT systems, eHealth and mHealth |
| BT Calendar 2005 | Commercial | Visitor sanitising in hospitals                                   | 8 | Health promotion and prevention of disease                              | I - infections         | Organisational programmes       |
| BT Calendar 2005 | Commercial | Outpatients at home - remote tele-medical consultations           | 8 | Supporting patients receiving care (designed to be used by individuals) | Other - generic        | IT systems, eHealth and mHealth |
| BT Calendar 2005 | Commercial | Individual's genome part of their medical record                  | 8 | Supporting patients receiving care (designed to be used by              | Other - generic        | Organisational programmes       |

## Appendix1: List of identified healthcare technologies

|                  |            |                                                                                                                |    |                                                                       |                     |                              |
|------------------|------------|----------------------------------------------------------------------------------------------------------------|----|-----------------------------------------------------------------------|---------------------|------------------------------|
|                  |            |                                                                                                                |    | individuals)                                                          |                     |                              |
| BT Calendar 2005 | Commercial | Portable bactericidal devices                                                                                  | 10 | Health promotion and prevention of disease                            | I - infections      | Medical equipment            |
| BT Calendar 2005 | Commercial | Bactericidal saws incorporated onto materials in hospitals                                                     | 10 | Health promotion and prevention of disease                            | I - infections      | Devices and biomaterials     |
| BT Calendar 2005 | Commercial | Robotic cleaners in hospitals                                                                                  | 10 | Supporting the provision of care and/or increasing service efficiency | Other - generic     | Medical equipment            |
| Daar et al 2002  | Research   | Modified molecular technologies for affordable, simple diagnosis of infectious diseases                        | 8  | Diagnosis and monitoring of disease                                   | I - infections      | Diagnostic tests and imaging |
| Daar et al 2002  | Research   | Recombinant technologies to develop vaccines against infectious diseases                                       | 8  | Health promotion and prevention of disease                            | I - infections      | Prophylactic vaccines        |
| Daar et al 2002  | Research   | Technologies for more efficient drug and vaccine delivery systems                                              | 8  | Treatment and management of symptoms and disease                      | Other - generic     | Unknown                      |
| Daar et al 2002  | Research   | Technologies for environmental improvement (sanitation, clean water, bioremediation)                           | 8  | Health promotion and prevention of disease                            | Other - generic     | Unknown                      |
| Daar et al 2002  | Research   | Female-controlled protection against sexually transmitted diseases, both with and without contraceptive effect | 8  | Health promotion and prevention of disease                            | XIV - genitourinary | Devices and biomaterials     |
| Daar et al 2002  | Research   | Genetically modified crops with increased nutrients to counter specific deficiencies                           | 8  | Health promotion and prevention of disease                            | IV - endocrine      | Unknown                      |



## Appendix1: List of identified healthcare technologies

|                 |                 |                                                                                                         |    |                                                                         |                 |                                   |
|-----------------|-----------------|---------------------------------------------------------------------------------------------------------|----|-------------------------------------------------------------------------|-----------------|-----------------------------------|
| Daar et al 2002 | Research        | Recombinant technology to make therapeutic products (for example, insulin, interferons) more affordable | 8  | Treatment and management of symptoms and disease                        | Other - generic | drugs (not prophylactic vaccines) |
| Karim2000       | Policy planning | Telemedicine                                                                                            | 15 | Supporting patients receiving care (designed to be used by individuals) | Other - generic | IT systems, eHealth and mHealth   |
| Karim2000       | Policy planning | Medical databases                                                                                       | 15 | Supporting the provision of care and/or increasing service efficiency   | Other - generic | IT systems, eHealth and mHealth   |
| Karim2000       | Policy planning | Expert System in managed care and preventive medicine                                                   | 15 | Supporting patients receiving care (designed to be used by individuals) | Other - generic | IT systems, eHealth and mHealth   |
| Karim2000       | Policy planning | diagnostic procedures (e.g. recombinant DNA techniques for parental screening)                          | 15 | Diagnosis and monitoring of disease                                     | Other - generic | Diagnostic tests and imaging      |
| Karim2000       | Policy planning | Therapeutic procedures (e.g. microsurgery and implanted muscle stimulators).                            | 15 | Treatment and management of symptoms and disease                        | Other - generic | Therapeutic procedures            |
| Karim2000       | Policy planning | Nanotechnology (e.g. devices which interact with tissues within the body to boost the immune system).   | 15 | Treatment and management of symptoms and disease                        | III - blood     | Devices and biomaterials          |
| Karim2000       | Policy planning | Vaccines against infectious diseases                                                                    | 15 | Health promotion and prevention of disease                              | I - infections  | Prophylactic vaccines             |
| Karim2000       | Policy planning | Development of an AIDS vaccine                                                                          | 15 | Health promotion and prevention of disease                              | I - infections  | Prophylactic vaccines             |
| Karim2000       | Policy planning | Development of a TB vaccine                                                                             | 15 | Health promotion and prevention of disease                              | I - infections  | Prophylactic vaccines             |
| Karim2000       | Policy planning | Health promotion targeted at the youth                                                                  | 15 | Health promotion and prevention of disease                              | Other - generic | Population programmes             |

## Appendix1: List of identified healthcare technologies

|            |                 |                                                                                                             |    |                                                                         |                        |                                   |
|------------|-----------------|-------------------------------------------------------------------------------------------------------------|----|-------------------------------------------------------------------------|------------------------|-----------------------------------|
| Karim2000  | Policy planning | Development of enriched and fortified staple foods                                                          | 15 | Health promotion and prevention of disease                              | Other - generic        | Population programmes             |
| Karim2000  | Policy planning | Development of a malaria vaccine                                                                            | 15 | Health promotion and prevention of disease                              | I - infections         | Prophylactic vaccines             |
| Karim2000  | Policy planning | Development of on-site diagnostic tools                                                                     | 15 | Diagnosis and monitoring of disease                                     | Other - generic        | Diagnostic tests and imaging      |
| Karim2000  | Policy planning | Development of female contraceptives                                                                        | 15 | Health promotion and prevention of disease                              | XXI - screening, rehab | drugs (not prophylactic vaccines) |
| Karim2000  | Policy planning | Development of barrier methods and microbicides for sexually transmitted diseases and HIV                   | 15 | Health promotion and prevention of disease                              | I - infections         | Devices and biomaterials          |
| Karim2000  | Policy planning | Development of malaria drugs                                                                                | 15 | Treatment and management of symptoms and disease                        | I - infections         | drugs (not prophylactic vaccines) |
| Karim2000  | Policy planning | Development of new TB drugs                                                                                 | 15 | Treatment and management of symptoms and disease                        | I - infections         | drugs (not prophylactic vaccines) |
| Karim2000  | Policy planning | Self management tools for chronic diseases (e.g. hypertension, diabetes, diarrhoea, psychiatric conditions) | 15 | Supporting patients receiving care (designed to be used by individuals) | Other - generic        | Organisational programmes         |
| Karim2000  | Policy planning | Tissue regeneration and gene therapy                                                                        | 15 | Treatment and management of symptoms and disease                        | Other - generic        | Regenerative medicine             |
| Sbipy 1988 | Research        | Monoclonal antibodies will be used in:<br>Histopathological techniques                                      | 0  | Diagnosis and monitoring of disease                                     | Other - generic        | Diagnostic tests and imaging      |
| Sbipy 1988 | Research        | Monoclonal antibodies will be used in:<br>Biochemical techniques                                            | 0  | Diagnosis and monitoring of disease                                     | Other - generic        | Diagnostic tests and imaging      |
| Sbipy 1988 | Research        | Monoclonal antibodies will be                                                                               | 0  | Diagnosis and monitoring of                                             | Other - generic        | Diagnostic tests and imaging      |

## Appendix1: List of identified healthcare technologies

|            |          |                                                                                                |    |                                            |                   |                              |
|------------|----------|------------------------------------------------------------------------------------------------|----|--------------------------------------------|-------------------|------------------------------|
|            |          | used in: in-vivo diagnostic techniques                                                         |    | disease                                    |                   |                              |
| Sbipy 1988 | Research | Monoclonal antibodies will be used in: Identification and localization of tumours              | 0  | Diagnosis and monitoring of disease        | II - cancers      | Diagnostic tests and imaging |
| Sbipy 1988 | Research | Gene probes will be used in: diagnostic microbiology                                           | 0  | Diagnosis and monitoring of disease        | I - infections    | Diagnostic tests and imaging |
| Sbipy 1988 | Research | Gene probes will be used in: diagnostic virology                                               | 0  | Diagnosis and monitoring of disease        | I - infections    | Diagnostic tests and imaging |
| Sbipy 1988 | Research | Gene probes will be used in: To screen for potentially deleterious genes*                      | 0  | Diagnosis and monitoring of disease        | Other - generic   | Diagnostic tests and imaging |
| Sbipy 1988 | Research | Gene probes will be used in: Diagnosing most genetic disorders                                 | 10 | Diagnosis and monitoring of disease        | XVII - congenital | Diagnostic tests and imaging |
| Sbipy 1988 | Research | Genetic engineering will enable the isolation of high risk groups for common diseases          | 10 | Health promotion and prevention of disease | Other - generic   | Population programmes        |
| Sbipy 1988 | Research | Imaging techniques will be in widespread and less hazardous use including: Ultrasound          | 0  | Diagnosis and monitoring of disease        | Other - generic   | Diagnostic tests and imaging |
| Sbipy 1988 | Research | Imaging techniques will be in widespread and less hazardous use including: Doppler measurement | 0  | Diagnosis and monitoring of disease        | Other - generic   | Diagnostic tests and imaging |
| Sbipy 1988 | Research | Imaging techniques will be in widespread and less hazardous use including: CT scanning         | 0  | Diagnosis and monitoring of disease        | Other - generic   | Diagnostic tests and imaging |

## Appendix1: List of identified healthcare technologies

|            |          |                                                                                                              |    |                                                  |                  |                                   |
|------------|----------|--------------------------------------------------------------------------------------------------------------|----|--------------------------------------------------|------------------|-----------------------------------|
| Sbipy 1988 | Research | Imaging techniques will be in widespread and less hazardous use including: NMR scanning                      | 0  | Diagnosis and monitoring of disease              | Other - generic  | Diagnostic tests and imaging      |
| Sbipy 1988 | Research | Imaging techniques will be in widespread and less hazardous use including: Nuclear medicine                  | 0  | Diagnosis and monitoring of disease              | Other - generic  | Diagnostic tests and imaging      |
| Sbipy 1988 | Research | Imaging techniques will be in widespread and less hazardous use including: Positron detection*               | 0  | Diagnosis and monitoring of disease              | Other - generic  | Diagnostic tests and imaging      |
| Sbipy 1988 | Research | Imaging techniques will be in widespread and less hazardous use including: Three-dimensional dynamic imaging | 10 | Diagnosis and monitoring of disease              | Other - generic  | Diagnostic tests and imaging      |
| Sbipy 1988 | Research | Drug therapy will be enhanced by: Genetic engineering                                                        | 10 | Treatment and management of symptoms and disease | Other - generic  | drugs (not prophylactic vaccines) |
| Sbipy 1988 | Research | Drug therapy will be enhanced by: Monoclonal antibodies used for drug targeting                              | 10 | Treatment and management of symptoms and disease | Other - generic  | drugs (not prophylactic vaccines) |
| Sbipy 1988 | Research | Drug delivery devices with or without in-vivo sensors                                                        | 10 | Treatment and management of symptoms and disease | Other - generic  | Devices and biomaterials          |
| Sbipy 1988 | Research | More effective Therapeutics will be available for: Viral infections                                          | 0  | Treatment and management of symptoms and disease | I - infections   | drugs (not prophylactic vaccines) |
| Sbipy 1988 | Research | More effective Therapeutics will be available for: Autoimmune diseases (monoclonal antibodies)               | 10 | Treatment and management of symptoms and disease | III - blood      | drugs (not prophylactic vaccines) |
| Sbipy 1988 | Research | More effective Therapeutics will                                                                             | 0  | Treatment and management of                      | IX - circulation | drugs (not prophylactic           |

## Appendix1: List of identified healthcare technologies

|            |          |                                                                                                                                                                                      |    |                                                           |                               |                                         |
|------------|----------|--------------------------------------------------------------------------------------------------------------------------------------------------------------------------------------|----|-----------------------------------------------------------|-------------------------------|-----------------------------------------|
|            |          | be available for:<br>Heart failure<br>(better drugs)                                                                                                                                 |    | symptoms and<br>disease                                   |                               | vaccines)                               |
| Sbipy 1988 | Research | More effective<br>Therapeutics will<br>be available for:<br>Obstructive<br>arterial lesions (by<br>removal and<br>control of<br>platelets and<br>synthetic vascular<br>prostheses)   | 10 | Treatment and<br>management of<br>symptoms and<br>disease | IX -<br>circulation           | drugs (not<br>prophylactic<br>vaccines) |
| Sbipy 1988 | Research | Cancer<br>(hyperthermia,<br>growth regulation<br>factors and<br>monoclonal<br>antibodies)                                                                                            | 10 | Other                                                     | II - cancers                  | Other                                   |
| Sbipy 1988 | Research | Cardiac<br>arrhythmias<br>(implantable<br>mechanisms)                                                                                                                                | 10 | Treatment and<br>management of<br>symptoms and<br>disease | IX -<br>circulation           | Devices and<br>biomaterials             |
| Sbipy 1988 | Research | More effective<br>Therapeutics will<br>be available for:<br>Arthritic joints<br>(more<br>biocompatible<br>prosthetic<br>materials and a<br>wider range of<br>joint<br>replacements)  | 0  | Treatment and<br>management of<br>symptoms and<br>disease | XIII -<br>musculoske<br>letal | Devices and<br>biomaterials             |
| Sbipy 1988 | Research | More effective<br>Therapeutics will<br>be available for:<br>Incontinence<br>(stimulation via<br>implantable<br>electrodes)                                                           | 0  | treatment and<br>management of<br>symptoms and<br>disease | XIV -<br>genitourina<br>ry    | Devices and<br>biomaterials             |
| Sbipy 1988 | Research | More effective<br>Therapeutics will<br>be available for:<br>Disability (wider<br>range of flow<br>technology aids<br>and biological<br>servomechanisms<br>linked to<br>computers and | 0  | Rehabilitation                                            | Other -<br>generic            | Other                                   |

## Appendix1: List of identified healthcare technologies

|            |          |                                                                                                 |    |                                                  |                        |                                   |
|------------|----------|-------------------------------------------------------------------------------------------------|----|--------------------------------------------------|------------------------|-----------------------------------|
|            |          | robotics)                                                                                       |    |                                                  |                        |                                   |
| Sbipy 1988 | Research | More effective Therapeutics will be available for: Limb damage (permanent internal bone repair) | 0  | Treatment and management of symptoms and disease | XIII - musculoskeletal | Devices and biomaterials          |
| Sbipy 1988 | Research | More effective Therapeutics will be available for: Tropical parasitic diseases (vaccines)       | 0  | Health promotion and prevention of disease       | I - infections         | Prophylactic vaccines             |
| Sbipy 1988 | Research | More effective Therapeutics will be available for: Mental disorders (neurotransmitters)         | 10 | Treatment and management of symptoms and disease | V - mental health      | drugs (not prophylactic vaccines) |
| Sbipy 1988 | Research | Laser microsurgery                                                                              | 0  | Treatment and management of symptoms and disease | Other - generic        | Therapeutic procedures            |
| Sbipy 1988 | Research | Laser endoscopic surgery                                                                        | 0  | Treatment and management of symptoms and disease | Other - generic        | Therapeutic procedures            |
| Sbipy 1988 | Research | Laser angioplasty and angiography                                                               | 0  | Treatment and management of symptoms and disease | IX - circulation       | Therapeutic procedures            |
| Sbipy 1988 | Research | Other laser and endoscopic surgical techniques                                                  | 10 | Treatment and management of symptoms and disease | Other - generic        | Therapeutic procedures            |
| Sbipy 1988 | Research | Cryosurgery                                                                                     | 10 | Treatment and management of symptoms and disease | Other - generic        | Therapeutic procedures            |
| Sbipy 1988 | Research | Lithotripsy                                                                                     | 10 | Treatment and management of symptoms and disease | Other - generic        | Therapeutic procedures            |
| Sbipy 1988 | Research | Transplantation will be enhanced by better techniques                                           | 0  | Treatment and management of symptoms and disease | Other - generic        | Devices and biomaterials          |

## Appendix1: List of identified healthcare technologies

|            |          |                                                                                                |    |                                                                         |                        |                                   |
|------------|----------|------------------------------------------------------------------------------------------------|----|-------------------------------------------------------------------------|------------------------|-----------------------------------|
|            |          | enabling long term in-vitro organ preservation and the prevention of rejection                 |    |                                                                         |                        |                                   |
| Sbipy 1988 | Research | Bone marrow transplantation with purified stem cells and autologous material will be available | 0  | Treatment and management of symptoms and disease                        | III - blood            | Regenerative medicine             |
| Sbipy 1988 | Research | A safe male pill for long-term use will be available                                           | 10 | Health promotion and prevention of disease                              | XXI - screening, rehab | drugs (not prophylactic vaccines) |
| Sbipy 1988 | Research | Improved techniques for detecting ovulation will enhance natural family planning*              | 0  | Diagnosis and monitoring of disease                                     | XIV - genitourinary    | Diagnostic tests and imaging      |
| Sbipy 1988 | Research | Optical disc storage and communication will be used with X-rays and other diagnostic images    | 0  | Supporting the provision of care and/or increasing service efficiency   | Other - generic        | Diagnostic tests and imaging      |
| Sbipy 1988 | Research | Computers will be used by clinical departments for data collection                             | 10 | Supporting the provision of care and/or increasing service efficiency   | Other - generic        | IT systems, eHealth and mHealth   |
| Sbipy 1988 | Research | Expert interrogation will be possible due to data centralization                               | 0  | Supporting the provision of care and/or increasing service efficiency   | Other - generic        | IT systems, eHealth and mHealth   |
| Sbipy 1988 | Research | Patient interviewing systems will be available in the surgery and in patients' homes           | 10 | Supporting patients receiving care (designed to be used by individuals) | Other - generic        | IT systems, eHealth and mHealth   |
| Sbipy 1988 | Research | Expert systems will enable diagnosis and define the most applicable treatment                  | 10 | Supporting patients receiving care (designed to be used by individuals) | Other - generic        | IT systems, eHealth and mHealth   |

## Appendix1: List of identified healthcare technologies

|            |                 |                                                                                                                               |     |                                                                       |                  |                                 |
|------------|-----------------|-------------------------------------------------------------------------------------------------------------------------------|-----|-----------------------------------------------------------------------|------------------|---------------------------------|
| Sbipy 1988 | Research        | Linkage of computerized patient data will be available between all hospital, community and primary care services and settings | 10  | Supporting the provision of care and/or increasing service efficiency | Other - generic  | IT systems, eHealth and mHealth |
| STG 1988   | Policy planning | Life style changing behaviours                                                                                                | N/A | Health promotion and prevention of disease                            | Other - generic  | Population programmes           |
| STG 1988   | Policy planning | Screening for phenylketonuria                                                                                                 | N/A | Health promotion and prevention of disease                            | IV - endocrine   | Population programmes           |
| STG 1988   | Policy planning | Screening for congenital hypothyroidism                                                                                       | N/A | Health promotion and prevention of disease                            | IV - endocrine   | Population programmes           |
| STG 1988   | Policy planning | Blood pressure can be checked by self-service meters                                                                          | N/A | Diagnosis and monitoring of disease                                   | IX - circulation | Diagnostic tests and imaging    |
| STG 1988   | Policy planning | High serum cholesterol can be checked by fingerprick blood test                                                               | N/A | Diagnosis and monitoring of disease                                   | IX - circulation | Diagnostic tests and imaging    |
| STG 1988   | Policy planning | Certain cancer tests can be self-administered                                                                                 | N/A | Diagnosis and monitoring of disease                                   | II - cancers     | Diagnostic tests and imaging    |
| STG 1988   | Policy planning | Improved diagnostic tests may be available for widespread use for screening at the community level                            | N/A | Health promotion and prevention of disease                            | Other - generic  | Population programmes           |
| STG 1988   | Policy planning | Improved vaccine against cholera in the tropical developing countries                                                         | N/A | Health promotion and prevention of disease                            | I - infections   | Prophylactic vaccines           |
| STG 1988   | Policy planning | New malaria vaccine in the tropical developing countries                                                                      | N/A | Health promotion and prevention of disease                            | I - infections   | Prophylactic vaccines           |
| STG 1988   | Policy planning | New vaccine against hepatitis B                                                                                               | N/A | Health promotion and prevention of disease                            | I - infections   | Prophylactic vaccines           |



## Appendix1: List of identified healthcare technologies

|          |                 |                                                                                         |     |                                                                         |                  |                                   |
|----------|-----------------|-----------------------------------------------------------------------------------------|-----|-------------------------------------------------------------------------|------------------|-----------------------------------|
| STG 1988 | Policy planning | New vaccine against respiratory syncytial virus                                         | N/A | Health promotion and prevention of disease                              | I - infections   | Prophylactic vaccines             |
| STG 1988 | Policy planning | New vaccine against influenza                                                           | N/A | Health promotion and prevention of disease                              | I - infections   | Prophylactic vaccines             |
| STG 1988 | Policy planning | New vaccine against AIDS                                                                | N/A | Health promotion and prevention of disease                              | I - infections   | Prophylactic vaccines             |
| STG 1988 | Policy planning | New vaccine against cytomegalovirus                                                     | N/A | Health promotion and prevention of disease                              | I - infections   | Prophylactic vaccines             |
| STG 1988 | Policy planning | Better vaccine against Perussis                                                         | N/A | Health promotion and prevention of disease                              | I - infections   | Prophylactic vaccines             |
| STG 1988 | Policy planning | Oral administration or administartion by nasal spray will facilitate mass immunization  | N/A | Health promotion and prevention of disease                              | I - infections   | Prophylactic vaccines             |
| STG 1988 | Policy planning | Creating vaccines containing antigens for several organisms given together (e.g. DPTPM) | N/A | Health promotion and prevention of disease                              | I - infections   | Prophylactic vaccines             |
| STG 1988 | Policy planning | Shifts in diet toward lower intake of fat especially saturated fat                      | N/A | Health promotion and prevention of disease                              | Other - generic  | Population programmes             |
| STG 1988 | Policy planning | Reliable and simple test for cholesterol                                                | N/A | Diagnosis and monitoring of disease                                     | IX - circulation | Diagnostic tests and imaging      |
| STG 1988 | Policy planning | More effective and safer drugs for treatment of elevated cholesterol                    | N/A | Health promotion and prevention of disease                              | IX - circulation | drugs (not prophylactic vaccines) |
| STG 1988 | Policy planning | Technologies for home use without professional supervision (e.g. home diagnostic kits)  | N/A | Supporting patients receiving care (designed to be used by individuals) | Other - generic  | Diagnostic tests and imaging      |
| STG 1988 | Policy planning | Disease conditions will be monitored from distant professional sites                    | N/A | Supporting patients receiving care (designed to be used by              | Other - generic  | IT systems, eHealth and mHealth   |

## Appendix1: List of identified healthcare technologies

|          |                 |                                                                                                                                                              |     |                                                  |                        |                                   |
|----------|-----------------|--------------------------------------------------------------------------------------------------------------------------------------------------------------|-----|--------------------------------------------------|------------------------|-----------------------------------|
|          |                 |                                                                                                                                                              |     | individuals)                                     |                        |                                   |
| STG 1988 | Policy planning | Robotics will be used for mobility and assistance at home such as nutrition and cleaning                                                                     | N/A | Rehabilitation                                   | Other - generic        | Assistive devices                 |
| STG 1988 | Policy planning | Regeneration of central nervous system through the use of nerve growth factors or transplant neurotransmitter-producing cells into the brain                 | N/A | Treatment and management of symptoms and disease | VI - nervous           | Regenerative medicine             |
| STG 1988 | Policy planning | Grafting of the spinal cord or the peripheral nervous system                                                                                                 | N/A | Treatment and management of symptoms and disease | VI - nervous           | Therapeutic procedures            |
| STG 1988 | Policy planning | More safer & effective contraception                                                                                                                         | N/A | Health promotion and prevention of disease       | XXI - screening, rehab | Drugs (not prophylactic vaccines) |
| STG 1988 | Policy planning | Contraceptive vaccine                                                                                                                                        | N/A | Health promotion and prevention of disease       | XXI - screening, rehab | Prophylactic vaccines             |
| STG 1988 | Policy planning | Alternatives to surgical abortion such as combination of antiprogestins and prostaglandins                                                                   | N/A | Treatment and management of symptoms and disease | XV - pregnancy         | drugs (not prophylactic vaccines) |
| STG 1988 | Policy planning | Treatment of infertility using new technologies such as in vitro fertilization, surrogate motherhood, freezing of germ cells and embryo with embryo transfer | N/A | Treatment and management of symptoms and disease | XIV - genitourinary    | Other                             |
| STG 1988 | Policy planning | Fetal cells can be isolated from the mother's bloodstream as a method for prenatal screening                                                                 | N/A | Health promotion and prevention of disease       | XXI - screening, rehab | Diagnostic tests and imaging      |

## Appendix1: List of identified healthcare technologies

|          |                 |                                                                                                                                         |     |                                                                         |                   |                              |
|----------|-----------------|-----------------------------------------------------------------------------------------------------------------------------------------|-----|-------------------------------------------------------------------------|-------------------|------------------------------|
| STG 1988 | Policy planning | Metabolic, physiologic information can be obtained by spectroscopy                                                                      | N/A | Diagnosis and monitoring of disease                                     | Other - generic   | Diagnostic tests and imaging |
| STG 1988 | Policy planning | Data from CT scanner will be stored on a disk, transmit by a phone line or othe communication                                           | N/A | Supporting patients receiving care (designed to be used by individuals) | Other - generic   | Diagnostic tests and imaging |
| STG 1988 | Policy planning | Film may disappear and computer will directly interpret the diagnosis                                                                   | N/A | Supporting patients receiving care (designed to be used by individuals) | Other - generic   | Diagnostic tests and imaging |
| STG 1988 | Policy planning | Biosensors to monitor disease condition or results of therapy (e.g. diabetes)                                                           | N/A | Diagnosis and monitoring of disease                                     | Other - generic   | Diagnostic tests and imaging |
| STG 1988 | Policy planning | Tumor markers that can be measured in blood                                                                                             | N/A | Diagnosis and monitoring of disease                                     | II - cancers      | Diagnostic tests and imaging |
| STG 1988 | Policy planning | Flow cytometer will be used in transplantation or monitoring of cancer therapy                                                          | N/A | Diagnosis and monitoring of disease                                     | II - cancers      | Diagnostic tests and imaging |
| STG 1988 | Policy planning | Monoclonal antibodies for diagnosis such as colon cancer and area of cardiac infarctions                                                | N/A | Diagnosis and monitoring of disease                                     | Other - generic   | Diagnostic tests and imaging |
| STG 1988 | Policy planning | Human gene therapy for a wide variety of diseases including cancer, diabetes, cardiovascular and affective disorders such as depression | N/A | Treatment and management of symptoms and disease                        | Other - generic   | Regenerative medicine        |
| STG 1988 | Policy planning | DNA probe for intra-uterine diagnosis of genetic diseases                                                                               | N/A | Diagnosis and monitoring of disease                                     | XVII - congenital | Diagnostic tests and imaging |
| STG 1988 | Policy planning | Home diagnostic kits for sexually                                                                                                       | 7   | Diagnosis and monitoring of                                             | I - infections    | Organisational programmes    |

## Appendix1: List of identified healthcare technologies

|          |                 |                                                                                                                 |     |                                                  |                  |                                   |
|----------|-----------------|-----------------------------------------------------------------------------------------------------------------|-----|--------------------------------------------------|------------------|-----------------------------------|
|          |                 | transmitted diseases and hepatitis                                                                              |     | disease                                          |                  |                                   |
| STG 1988 | Policy planning | Home diagnostic kits for screening for cancer                                                                   | 7   | Diagnosis and monitoring of disease              | I - infections   | Organisational programmes         |
| STG 1988 | Policy planning | Home diagnostic kits to test for common diseases with genetic basis such as diabetes                            | N/A | Diagnosis and monitoring of disease              | Other - generic  | Organisational programmes         |
| STG 1988 | Policy planning | Genetic insertion therapy for treatment of certain blood disorders such as thalassaemia and sickle cell anaemia | N/A | Treatment and management of symptoms and disease | III - blood      | Regenerative medicine             |
| STG 1988 | Policy planning | Oral treatment forms for hormones, enzymes and other peptides may be developed                                  | N/A | Treatment and management of symptoms and disease | Other - generic  | Drugs (not prophylactic vaccines) |
| STG 1988 | Policy planning | New drugs for asthma                                                                                            | N/A | Treatment and management of symptoms and disease | X - respiratory  | Drugs (not prophylactic vaccines) |
| STG 1988 | Policy planning | New drugs for coronary artery diseases                                                                          | N/A | Treatment and management of symptoms and disease | IX - circulation | Drugs (not prophylactic vaccines) |
| STG 1988 | Policy planning | Monoclonal antibodies to replace immune globulins                                                               | N/A | Treatment and management of symptoms and disease | III - blood      | Drugs (not prophylactic vaccines) |
| STG 1988 | Policy planning | Cloning of skin                                                                                                 | N/A | Treatment and management of symptoms and disease | XII - skin       | Regenerative medicine             |
| STG 1988 | Policy planning | Growth of retinal tissue and corneal endothelium                                                                | N/A | Treatment and management of symptoms and disease | VII - eye        | Regenerative medicine             |
| STG 1988 | Policy planning | Total body irradiation for transplant (to prevent rejection)                                                    | N/A | Treatment and management of symptoms and disease | III - blood      | Non-surgical therapy              |
| STG 1988 | Policy planning | Artificial heart                                                                                                | N/A | Treatment and management of symptoms and         | IX - circulation | Regenerative medicine             |

## Appendix1: List of identified healthcare technologies

|          |                 |                                                                                                                       |     |                                                  |                              |                              |
|----------|-----------------|-----------------------------------------------------------------------------------------------------------------------|-----|--------------------------------------------------|------------------------------|------------------------------|
|          |                 |                                                                                                                       |     | disease                                          |                              |                              |
| STG 1988 | Policy planning | Artificial pancreas                                                                                                   | N/A | Treatment and management of symptoms and disease | IV - endocrine               | Regenerative medicine        |
| STG 1988 | Policy planning | Shoulder joint replacement                                                                                            | N/A | Treatment and management of symptoms and disease | XIII - musculoskeletal       | Devices and biomaterials     |
| STG 1988 | Policy planning | Cochlear implants                                                                                                     | N/A | Treatment and management of symptoms and disease | VIII - ear                   | Devices and biomaterials     |
| STG 1988 | Policy planning | Coating of implant materials to improve acceptability                                                                 | N/A | Other                                            | Other - generic              | Devices and biomaterials     |
| STG 1988 | Policy planning | Functional electrical stimulation in prosthetics allowing brain to control the action                                 | N/A | Rehabilitation                                   | XXI - screening, rehab       | Devices and biomaterials     |
| STG 1988 | Policy planning | Prosthetic fingers                                                                                                    | N/A | Rehabilitation                                   | XIII - musculoskeletal       | Devices and biomaterials     |
| STG 1988 | Policy planning | Organ transplant and improvement of functional activities of organs (pancreas, bone, small bowel, endocrine glands..) | N/A | Treatment and management of symptoms and disease | Other - generic              | Other                        |
| STG 1988 | Policy planning | Microprocessor to restore damaged areas of the brain                                                                  | N/A | Rehabilitation                                   | VI - nervous                 | Devices and biomaterials     |
| STG 1988 | Policy planning | Laser cytofluorometry will be used to identify RNA and DNA in the plasma                                              | N/A | Diagnosis and monitoring of disease              | Other - generic              | Diagnostic tests and imaging |
| STG 1988 | Policy planning | Laser doppler to measure blood flow in the retina                                                                     | N/A | Diagnosis and monitoring of disease              | Other - generic              | Diagnostic tests and imaging |
| STG 1988 | Policy planning | Laser to stop gastrointestinal bleeding                                                                               | N/A | Treatment and management of symptoms and disease | XI - GI tract, dental health | Therapeutic procedures       |

## Appendix1: List of identified healthcare technologies

|          |                 |                                                                                         |     |                                                                         |                              |                                 |
|----------|-----------------|-----------------------------------------------------------------------------------------|-----|-------------------------------------------------------------------------|------------------------------|---------------------------------|
| STG 1988 | Policy planning | Laser to break urinary stones                                                           | N/A | Treatment and management of symptoms and disease                        | XIV - genitourinary          | Therapeutic procedures          |
| STG 1988 | Policy planning | Laser surgery through endoscope                                                         | N/A | Treatment and management of symptoms and disease                        | Other - generic              | Therapeutic procedures          |
| STG 1988 | Policy planning | Widespread use of microsurgery                                                          | N/A | Treatment and management of symptoms and disease                        | Other - generic              | Therapeutic procedures          |
| STG 1988 | Policy planning | Electronic gas valve regulator for safety in anaesthesia                                | N/A | Supporting the provision of care and/or increasing service efficiency   | XIX - injury                 | Medical equipment               |
| STG 1988 | Policy planning | Instantaneous measurement of blood gases and drug levels in the body during anaesthesia | N/A | Supporting patients receiving care (designed to be used by individuals) | XIX - injury                 | Diagnostic tests and imaging    |
| STG 1988 | Policy planning | Computerised ECG operating room                                                         | N/A | Supporting the provision of care and/or increasing service efficiency   | Other - generic              | IT systems, eHealth and mHealth |
| STG 1988 | Policy planning | Data on each patient available at any moment during the operation                       | N/A | Supporting patients receiving care (designed to be used by individuals) | Other - generic              | IT systems, eHealth and mHealth |
| STG 1988 | Policy planning | Computerised electroanaesthesia                                                         | N/A | Supporting patients receiving care (designed to be used by individuals) | Other - generic              | IT systems, eHealth and mHealth |
| STG 1988 | Policy planning | New methods to close wounds e.g. tissue glue with ultrasound                            | N/A | Treatment and management of symptoms and disease                        | Other - generic              | Devices and biomaterials        |
| STG 1988 | Policy planning | Spectroscopy using optical methods to diagnose caries                                   | N/A | Diagnosis and monitoring of disease                                     | XI - GI tract, dental health | Diagnostic tests and imaging    |
| STG 1988 | Policy planning | Bone like implants for teeth and bones                                                  | N/A | Treatment and management of symptoms and disease                        | XI - GI tract, dental health | Devices and biomaterials        |
| STG 1988 | Policy planning | Home monitoring especially of the elderly                                               | N/A | Supporting patients receiving care (designed to                         | Other - generic              | IT systems, eHealth and mHealth |

## Appendix1: List of identified healthcare technologies

|                                  |                 |                                                                            |     |                                                                         |                        |                                   |
|----------------------------------|-----------------|----------------------------------------------------------------------------|-----|-------------------------------------------------------------------------|------------------------|-----------------------------------|
|                                  |                 |                                                                            |     | be used by individuals)                                                 |                        |                                   |
| STG 1988                         | Policy planning | Networks for communications between and within hospitals                   | N/A | Supporting the provision of care and/or increasing service efficiency   | Other - generic        | IT systems, eHealth and mHealth   |
| STG 1988                         | Policy planning | Huge mass memories (e.g. on laser disc) for the storage of medical records | N/A | Supporting the provision of care and/or increasing service efficiency   | Other - generic        | IT systems, eHealth and mHealth   |
| STG 1988                         | Policy planning | Video disk oriented data base for medical records                          | N/A | Supporting the provision of care and/or increasing service efficiency   | Other - generic        | IT systems, eHealth and mHealth   |
| STG 1988                         | Policy planning | Computer aided examination and testing                                     | N/A | Supporting patients receiving care (designed to be used by individuals) | Other - generic        | IT systems, eHealth and mHealth   |
| STG 1988                         | Policy planning | Improved biomaterials for joint implants and plastic surgery               | N/A | Treatment and management of symptoms and disease                        | XIII - musculoskeletal | Devices and biomaterials          |
| STG 1988                         | Policy planning | Improved materials for artificial blood vessels                            | N/A | Treatment and management of symptoms and disease                        | IX - circulation       | Devices and biomaterials          |
| Cahill et al Technology Map 1999 | policy planning | Therapeutics for arterial occlusion and myocardial infarction              | 4   | Treatment and management of symptoms and disease                        | IX - circulation       | Drugs (not prophylactic vaccines) |
| Cahill et al Technology Map 1999 | Policy planning | Guidelines for adult disease preventing life style                         | 8   | Supporting the provision of care and/or increasing service efficiency   | XXI - screening, rehab | Organisational programmes         |
| Cahill et al Technology Map 1999 | policy planning | Development of anti-cancer agents (gene level)                             | 11  | Treatment and management of symptoms and disease                        | II - cancers           | Drugs (not prophylactic vaccines) |
| Cahill et al Technology Map 1999 | policy planning | drugs preventing the occurrence of cancer                                  | 12  | Health promotion and prevention of disease                              | II - cancers           | Drugs (not prophylactic vaccines) |
| Cahill et al Technology Map 1999 | policy planning | Effective means to prevent metastasis                                      | 15  | Health promotion and prevention of disease                              | II - cancers           | Unknown                           |
| Cahill et al Technology Map 1999 | policy planning | Genetic/biochemical tests for schizophrenia and depression                 | 9   | Diagnosis and monitoring of disease                                     | VI - nervous           | Diagnostic tests and imaging      |

## Appendix1: List of identified healthcare technologies

|                                                 |                 |                              |    |                                                                         |                        |                                 |
|-------------------------------------------------|-----------------|------------------------------|----|-------------------------------------------------------------------------|------------------------|---------------------------------|
| Food and Drug Administration (FDA) surveys 1998 | Policy planning | Biosensors                   | 10 | Unknown                                                                 | Other - generic        | Diagnostic tests and imaging    |
| Food and Drug Administration (FDA) surveys 1998 | Policy planning | Laser diagnosis              | 10 | Diagnosis and monitoring of disease                                     | Other - generic        | Diagnostic tests and imaging    |
| Food and Drug Administration (FDA) surveys 1998 | Policy planning | Tissue engineered devices    | 10 | Treatment and management of symptoms and disease                        | Other - generic        | Devices and biomaterials        |
| Food and Drug Administration (FDA) surveys 1998 | Policy planning | Blood vessel prosthetics     | 10 | Treatment and management of symptoms and disease                        | IX - circulation       | Regenerative medicine           |
| Food and Drug Administration (FDA) surveys 1998 | Policy planning | Bone prosthetics/ growth     | 10 | Treatment and management of symptoms and disease                        | XIII - musculoskeletal | Regenerative medicine           |
| Food and Drug Administration (FDA) surveys 1998 | Policy planning | Cardiac stimulation          | 10 | Treatment and management of symptoms and disease                        | IX - circulation       | Unknown                         |
| Food and Drug Administration (FDA) surveys 1998 | Policy planning | cartilage prosthetics        | 10 | Treatment and management of symptoms and disease                        | XIII - musculoskeletal | Devices and biomaterials        |
| Food and Drug Administration (FDA) surveys 1998 | Policy planning | Computer aided clinical labs | 10 | Diagnosis and monitoring of disease                                     | Other - generic        | IT systems, eHealth and mHealth |
| Food and Drug Administration (FDA) surveys 1998 | Policy planning | Computer aided diagnosis     | 10 | Supporting the provision of care and/or increasing service efficiency   | Other - generic        | IT systems, eHealth and mHealth |
| Food and Drug Administration (FDA) surveys 1998 | Policy planning | Telemedicine                 | 10 | Supporting patients receiving care (designed to be used by individuals) | Other - generic        | IT systems, eHealth and mHealth |
| Food and Drug Administration (FDA) surveys 1998 | Policy planning | Drug impregnated devices     | 10 | Treatment and management of symptoms and disease                        | Other - generic        | Devices and biomaterials        |
| Food and Drug Administration (FDA) surveys 1998 | Policy planning | Endoscopy                    | 10 | Diagnosis and monitoring of disease                                     | Other - generic        | Diagnostic tests and imaging    |
| Food and Drug Administration                    | Policy planning | Hearing aids/Nonimplante     | 10 | Rehabilitation                                                          | VIII - ear             | Devices and biomaterials        |



## Appendix1: List of identified healthcare technologies

|                                                 |                 |                                                    |    |                                                                         |                              |                                 |
|-------------------------------------------------|-----------------|----------------------------------------------------|----|-------------------------------------------------------------------------|------------------------------|---------------------------------|
| (FDA) surveys 1998                              |                 | d sensory aids                                     |    |                                                                         |                              |                                 |
| Food and Drug Administration (FDA) surveys 1998 | Policy planning | Heart valves                                       | 10 | Treatment and management of symptoms and disease                        | IX - circulation             | Devices and biomaterials        |
| Food and Drug Administration (FDA) surveys 1998 | Policy planning | Heart pumps                                        | 10 | Treatment and management of symptoms and disease                        | IX - circulation             | Devices and biomaterials        |
| Food and Drug Administration (FDA) surveys 1998 | Policy planning | Home diagnostics /Home/self monitoring & diagnosis | 10 | Supporting patients receiving care (designed to be used by individuals) | Other - generic              | Organisational programmes       |
| Food and Drug Administration (FDA) surveys 1998 | Policy planning | Image contrast agents                              | 10 | Diagnosis and monitoring of disease                                     | Other - generic              | Diagnostic tests and imaging    |
| Food and Drug Administration (FDA) surveys 1998 | Policy planning | Integrated patient medical info systems            | 10 | Supporting the provision of care and/or increasing service efficiency   | Other - generic              | IT systems, eHealth and mHealth |
| Food and Drug Administration (FDA) surveys 1998 | Policy planning | Laser treatment                                    | 10 | Treatment and management of symptoms and disease                        | Other - generic              | Non-surgical therapy            |
| Food and Drug Administration (FDA) surveys 1998 | Policy planning | kidney prosthetics                                 | 10 | Treatment and management of symptoms and disease                        | XIV - genitourinary          | Regenerative medicine           |
| Food and Drug Administration (FDA) surveys 1998 | Policy planning | Laser surgery                                      | 10 | Treatment and management of symptoms and disease                        | Other - generic              | Non-surgical therapy            |
| Food and Drug Administration (FDA) surveys 1998 | Policy planning | Liver prosthetics                                  | 10 | Treatment and management of symptoms and disease                        | XI - GI tract, dental health | Regenerative medicine           |
| Food and Drug Administration (FDA) surveys 1998 | Policy planning | Mini invasive neurosurgery                         | 10 | Treatment and management of symptoms and disease                        | VI - nervous                 | Therapeutic procedures          |
| Food and Drug Administration (FDA) surveys 1998 | Policy planning | Mini invasive cardiac surgery                      | 10 | Treatment and management of symptoms and disease                        | IX - circulation             | Therapeutic procedures          |
| Food and Drug Administration (FDA) surveys 1998 | Policy planning | MRI                                                | 10 | Diagnosis and monitoring of disease                                     | Other - generic              | Diagnostic tests and imaging    |

## Appendix1: List of identified healthcare technologies

|                                                 |                 |                           |    |                                                                         |                 |                                 |
|-------------------------------------------------|-----------------|---------------------------|----|-------------------------------------------------------------------------|-----------------|---------------------------------|
| Food and Drug Administration (FDA) surveys 1998 | Policy planning | Neuromuscular stimulation | 10 | Treatment and management of symptoms and disease                        | Other - generic | Non-surgical therapy            |
| Food and Drug Administration (FDA) surveys 1998 | Policy planning | Nerve regeneration        | 10 | Treatment and management of symptoms and disease                        | VI - nervous    | Regenerative medicine           |
| Food and Drug Administration (FDA) surveys 1998 | Policy planning | Neural stimulation        | 10 | Treatment and management of symptoms and disease                        | VI - nervous    | Non-surgical therapy            |
| Food and Drug Administration (FDA) surveys 1998 | Policy planning | Ocular prosthetics        | 10 | Treatment and management of symptoms and disease                        | VII - eye       | Devices and biomaterials        |
| Food and Drug Administration (FDA) surveys 1998 | Policy planning | Pancreas prosthetics      | 10 | Treatment and management of symptoms and disease                        | IV - endocrine  | Regenerative medicine           |
| Food and Drug Administration (FDA) surveys 1998 | Policy planning | Patient smart cards       | 10 | Supporting patients receiving care (designed to be used by individuals) | Other - generic | IT systems, eHealth and mHealth |
| Food and Drug Administration (FDA) surveys 1998 | Policy planning | Robotic surgery           | 10 | Treatment and management of symptoms and disease                        | Other - generic | Therapeutic procedures          |
| Food and Drug Administration (FDA) surveys 1998 | Policy planning | Skin prosthetics          | 10 | Treatment and management of symptoms and disease                        | XII - skin      | Regenerative medicine           |
| Food and Drug Administration (FDA) surveys 1998 | Policy planning | Telemedicine-home use     | 10 | Supporting patients receiving care (designed to be used by individuals) | Other - generic | IT systems, eHealth and mHealth |
| Food and Drug Administration (FDA) surveys 1998 | Policy planning | Telemedicine-radiology    | 10 | Supporting patients receiving care (designed to be used by individuals) | Other - generic | IT systems, eHealth and mHealth |
| Food and Drug Administration (FDA) surveys 2008 | Policy planning | Robotic surgical systems  | 0  | Treatment and management of symptoms and disease                        | Other - generic | Therapeutic procedures          |
| Food and Drug Administration (FDA) surveys 1998 | Policy planning | Point-of-care products    | 10 | Diagnosis and monitoring of disease                                     | Other - generic | Diagnostic tests and imaging    |

## Appendix1: List of identified healthcare technologies

|                                                 |                 |                                                                              |    |                                                                         |                        |                                 |
|-------------------------------------------------|-----------------|------------------------------------------------------------------------------|----|-------------------------------------------------------------------------|------------------------|---------------------------------|
| Food and Drug Administration (FDA) surveys 1998 | Policy planning | Computer-assisted diagnostic systems                                         | 10 | Diagnosis and monitoring of disease                                     | Other - generic        | IT systems, eHealth and mHealth |
| Food and Drug Administration (FDA) surveys 1998 | Policy planning | Neuro-sensory devices                                                        | 10 | Diagnosis and monitoring of disease                                     | VI - nervous           | Devices and biomaterials        |
| Food and Drug Administration (FDA) surveys 1998 | Policy planning | Optical diagnostic products                                                  | 10 | Diagnosis and monitoring of disease                                     | Other - generic        | Diagnostic tests and imaging    |
| Food and Drug Administration (FDA) surveys 1998 | Policy planning | Integrated electronic patient medical records                                | 10 | Supporting the provision of care and/or increasing service efficiency   | Other - generic        | IT systems, eHealth and mHealth |
| Food and Drug Administration (FDA) surveys 1998 | Policy planning | Remote patient monitoring systems                                            | 10 | Supporting patients receiving care (designed to be used by individuals) | Other - generic        | IT systems, eHealth and mHealth |
| Food and Drug Administration (FDA) surveys 1998 | Policy planning | Glucose monitoring products                                                  | 10 | Diagnosis and monitoring of disease                                     | IV - endocrine         | Diagnostic tests and imaging    |
| Food and Drug Administration (FDA) surveys 1998 | Policy planning | Tissue engineered products                                                   | 10 | Treatment and management of symptoms and disease                        | Other - generic        | Regenerative medicine           |
| Food and Drug Administration (FDA) surveys 1998 | Policy planning | Advanced prosthetic limbs                                                    | 10 | Rehabilitation                                                          | XIII - musculoskeletal | Devices and biomaterials        |
| Food and Drug Administration (FDA) surveys 1998 | Policy planning | Minimally invasive implants (e.g., percutaneous or natural orifice delivery) | 10 | Treatment and management of symptoms and disease                        | Other - generic        | Devices and biomaterials        |
| Food and Drug Administration (FDA) surveys 1998 | Policy planning | Virtual reality systems for immersive training and other applications        | 10 | Unknown                                                                 | Other - generic        | IT systems, eHealth and mHealth |
| Food and Drug Administration (FDA) surveys 1998 | Policy planning | Optical therapeutic devices                                                  | 10 | Treatment and management of symptoms and disease                        | Other - generic        | Devices and biomaterials        |
| Food and Drug Administration (FDA) surveys 1998 | Policy planning | Internet-based medical device systems                                        | 10 | Supporting patients receiving care (designed to be used by              | Other - generic        | IT systems, eHealth and mHealth |

## Appendix1: List of identified healthcare technologies

|                                                 |                 |                                                 |    |                                                            |                        |                                   |
|-------------------------------------------------|-----------------|-------------------------------------------------|----|------------------------------------------------------------|------------------------|-----------------------------------|
|                                                 |                 |                                                 |    | individuals)                                               |                        |                                   |
| Food and Drug Administration (FDA) surveys 1998 | Policy planning | New (non-eluting) drug delivery systems         | 10 | Treatment and management of symptoms and disease           | Other - generic        | Drugs (not prophylactic vaccines) |
| Food and Drug Administration (FDA) surveys 1998 | Policy planning | Robotic prosthetics                             | 20 | Rehabilitation                                             | Other - generic        | Devices and biomaterials          |
| Food and Drug Administration (FDA) surveys 1998 | Policy planning | New types of insulin pumps and delivery systems | 20 | Treatment and management of symptoms and disease           | IV - endocrine         | Devices and biomaterials          |
| Food and Drug Administration (FDA) surveys 1998 | Policy planning | New types of stents                             | 20 | Treatment and management of symptoms and disease           | IX - circulation       | Devices and biomaterials          |
| Food and Drug Administration (FDA) surveys 1998 | Policy planning | Joint replacements                              | 20 | Treatment and management of symptoms and disease           | XIII - musculoskeletal | Devices and biomaterials          |
| Food and Drug Administration (FDA) surveys 1998 | Policy planning | Image-guided therapy systems                    | 20 | Treatment and management of symptoms and disease           | Other - generic        | Therapeutic procedures            |
| Food and Drug Administration (FDA) surveys 1998 | Policy planning | Advanced ultrasound imaging systems             | 20 | Diagnosis and monitoring of disease                        | Other - generic        | Diagnostic tests and imaging      |
| Food and Drug Administration (FDA) surveys 1998 | Policy planning | Advanced optical imaging systems                | 20 | Diagnosis and monitoring of disease                        | Other - generic        | Diagnostic tests and imaging      |
| Food and Drug Administration (FDA) surveys 1998 | Policy planning | Advanced MR imaging systems                     | 20 | Diagnosis and monitoring of disease                        | Other - generic        | Diagnostic tests and imaging      |
| Food and Drug Administration (FDA) surveys 1998 | Policy planning | Minimally invasive radiotherapy systems         | 20 | Treatment and management of symptoms and disease           | II - cancers           | Non-surgical therapy              |
| Food and Drug Administration (FDA) surveys 1998 | Policy planning | Genetic diagnostic products                     | 20 | Diagnosis and monitoring of disease                        | Other - generic        | Diagnostic tests and imaging      |
| Food and Drug Administration (FDA) surveys 1998 | Policy planning | Remote patient monitoring systems               | 20 | Supporting patients receiving care (designed to be used by | Other - generic        | IT systems, eHealth and mHealth   |

## Appendix1: List of identified healthcare technologies

|                               |          |                                                                                                             |    |                                                                         |                 |                                   |
|-------------------------------|----------|-------------------------------------------------------------------------------------------------------------|----|-------------------------------------------------------------------------|-----------------|-----------------------------------|
|                               |          |                                                                                                             |    | individuals)                                                            |                 |                                   |
| Institute of the Future, 2009 | Research | Bio-marker based tools will screen for future disease risk and produce new diagnoses based on probabilities | 11 | Diagnosis and monitoring of disease                                     | Other - generic | Diagnostic tests and imaging      |
| Institute of the Future, 2009 | Research | Visualizations improve diet & exercise                                                                      | 11 | Health promotion and prevention of disease                              | Other - generic | Non-surgical therapy              |
| Institute of the Future, 2009 | Research | GPS-enabled asthma inhalers                                                                                 | 11 | Supporting the provision of care and/or increasing service efficiency   | X - respiratory | IT systems, eHealth and mHealth   |
| Institute of the Future, 2009 | Research | Workplace clinics                                                                                           | 11 | Health promotion and prevention of disease                              | Other - generic | Organisational programmes         |
| Institute of the Future, 2009 | Research | Urban planning for walkability, pollution reduction, neighbourhood food systems                             | 11 | Health promotion and prevention of disease                              | Other - generic | Population programmes             |
| Institute of the Future, 2009 | Research | Report cards include Body Mass Index (BMI) scores                                                           | 11 | Health promotion and prevention of disease                              | Other - generic | Population programmes             |
| Institute of the Future, 2009 | Research | iPhone-synched medical devices                                                                              | 11 | Supporting patients receiving care (designed to be used by individuals) | Other - generic | IT systems, eHealth and mHealth   |
| Institute of the Future, 2009 | Research | Quantifying, visualizing, and mapping health implications of environments                                   | 11 | Health promotion and prevention of disease                              | Other - generic | Population programmes             |
| Institute of the Future, 2009 | Research | Deep brain stimulation used for neurological, behavioral issues                                             | 11 | Treatment and management of symptoms and disease                        | VI - nervous    | Devices and biomaterials          |
| Institute of the Future, 2009 | Research | Home sensors for elder care                                                                                 | 11 | Supporting patients receiving care (designed to be used by individuals) | Other - generic | IT systems, eHealth and mHealth   |
| Institute of the Future, 2009 | Research | Individually targeted therapies                                                                             | 11 | Treatment and management of symptoms and                                | Other - generic | Drugs (not prophylactic vaccines) |

## Appendix1: List of identified healthcare technologies

|                               |          |                                                                                                                                                                |    |                                                                         |                        |                                   |
|-------------------------------|----------|----------------------------------------------------------------------------------------------------------------------------------------------------------------|----|-------------------------------------------------------------------------|------------------------|-----------------------------------|
|                               |          |                                                                                                                                                                |    | disease                                                                 |                        |                                   |
| Institute of the Future, 2009 | Research | Sensors track drug efficacy                                                                                                                                    | 11 | Supporting patients receiving care (designed to be used by individuals) | Other - generic        | Devices and biomaterials          |
| Institute of the Future, 2009 | Research | Genotypic diagnostics and risk                                                                                                                                 | 11 | Diagnosis and monitoring of disease                                     | Other - generic        | Diagnostic tests and imaging      |
| Institute of the Future, 2009 | Research | New technologies enable individuals to experience the future effects of present-day behavior choices                                                           | 11 | Treatment and management of symptoms and disease                        | Other - generic        | Unknown                           |
| Institute of the Future, 2009 | Research | Regenerative medicine (general) will replace, restore, maintain, or enhance tissue and organ functions                                                         | 11 | Treatment and management of symptoms and disease                        | Other - generic        | Regenerative medicine             |
| Institute of the Future, 2009 | Research | New ways of reliably measuring subjective states such as happiness, anxiety, or pain, and finding the neural correlates of personality and behavioral patterns | 11 | Diagnosis and monitoring of disease                                     | VI - nervous           | Diagnostic tests and imaging      |
| Institute of the Future, 2009 | Research | prototype of a prosthetic arm that can be controlled naturally and provide sensory feedback.                                                                   | 11 | Rehabilitation                                                          | XIII - musculoskeletal | Devices and biomaterials          |
| Stevens et al 1997            | Research | Magnetic resonance imaging                                                                                                                                     | 1  | Diagnosis and monitoring of disease                                     | Other - generic        | Diagnostic tests and imaging      |
| Stevens et al 1997            | Research | Minimally invasive surgery                                                                                                                                     | 1  | Treatment and management of symptoms and disease                        | Other - generic        | Therapeutic procedures            |
| Stevens et al 1997            | Research | drugs for Therapeutic refractory                                                                                                                               | 1  | Treatment and management of symptoms and                                | V - mental health      | Drugs (not prophylactic vaccines) |

## Appendix1: List of identified healthcare technologies

|                    |          |                                                   |   |                                                                       |                     |                                   |
|--------------------|----------|---------------------------------------------------|---|-----------------------------------------------------------------------|---------------------|-----------------------------------|
|                    |          | schizophrenia                                     |   | disease                                                               |                     |                                   |
| Stevens et al 1997 | Research | Implantable vascular stents                       | 1 | Treatment and management of symptoms and disease                      | IX - circulation    | Devices and biomaterials          |
| Stevens et al 1997 | Research | Peripheral blood stem cells transplantation       | 1 | Treatment and management of symptoms and disease                      | Other - generic     | Regenerative medicine             |
| Stevens et al 1997 | Research | Laser Therapeutic of benign prostatic hyperplasia | 1 | Treatment and management of symptoms and disease                      | XIV - genitourinary | Non-surgical therapy              |
| Stevens et al 1997 | Research | Gene therapy advances                             | 4 | Treatment and management of symptoms and disease                      | Other - generic     | Regenerative medicine             |
| Stevens et al 1997 | Research | Polymerase chain reaction                         | 4 | Diagnosis and monitoring of disease                                   | Other - generic     | Diagnostic tests and imaging      |
| Stevens et al 1997 | Research | Telemedicine                                      | 4 | Supporting the provision of care and/or increasing service efficiency | Other - generic     | IT systems, eHealth and mHealth   |
| Stevens et al 1997 | Research | Interventional radiology                          | 1 | Treatment and management of symptoms and disease                      | Other - generic     | Non-surgical therapy              |
| Stevens et al 1997 | Research | Angioplasty                                       | 1 | Treatment and management of symptoms and disease                      | IX - circulation    | Therapeutic procedures            |
| Stevens et al 1997 | Research | Interferon for chronic granulocytic leukemia      | 1 | Treatment and management of symptoms and disease                      | II - cancers        | Drugs (not prophylactic vaccines) |
| Stevens et al 1997 | Research | Interferon for hepatitis C                        | 1 | Treatment and management of symptoms and disease                      | I - infections      | Drugs (not prophylactic vaccines) |
| Stevens et al 1997 | Research | Lasers for dermatology                            | 1 | Treatment and management of symptoms and disease                      | XII - skin          | Devices and biomaterials          |
| Stevens et al 1997 | Research | Adjuvant chemotherapy in lung cancer              | 4 | Treatment and management of symptoms and disease                      | II - cancers        | Drugs (not prophylactic vaccines) |

## Appendix1: List of identified healthcare technologies

|                    |          |                                                             |   |                                                                       |                        |                                   |
|--------------------|----------|-------------------------------------------------------------|---|-----------------------------------------------------------------------|------------------------|-----------------------------------|
| Stevens et al 1997 | Research | Near patient testing                                        | 2 | Diagnosis and monitoring of disease                                   | Other - generic        | Diagnostic tests and imaging      |
| Stevens et al 1997 | Research | Revision of joint replacement                               | 1 | Treatment and management of symptoms and disease                      | XIII - musculoskeletal | Therapeutic procedures            |
| Stevens et al 1997 | Research | Genetic screening                                           | 4 | Diagnosis and monitoring of disease                                   | Other - generic        | Diagnostic tests and imaging      |
| Stevens et al 1997 | Research | Helicobacter pylori eradication                             | 1 | Treatment and management of symptoms and disease                      | I - infections         | Drugs (not prophylactic vaccines) |
| Stevens et al 1997 | Research | Positron emission tomography                                | 4 | Diagnosis and monitoring of disease                                   | Other - generic        | Diagnostic tests and imaging      |
| Stevens et al 1997 | Research | Phacoemulsification                                         | 1 | Treatment and management of symptoms and disease                      | VII - eye              | Therapeutic procedures            |
| Stevens et al 1997 | Research | Cochlear implants                                           | 1 | Rehabilitation                                                        | VIII - ear             | Devices and biomaterials          |
| Stevens et al 1997 | Research | Paclitaxels for ovarian & breast cancer                     | 2 | Treatment and management of symptoms and disease                      | II - cancers           | Drugs (not prophylactic vaccines) |
| Stevens et al 1997 | Research | Bone densitometry screening                                 | 1 | Diagnosis and monitoring of disease                                   | XIII - musculoskeletal | Diagnostic tests and imaging      |
| Stevens et al 1997 | Research | Anticoagulants for atrial fibrillation                      | 1 | Health promotion and prevention of disease                            | IX - circulation       | Drugs (not prophylactic vaccines) |
| Stevens et al 1997 | Research | Picture archiving and communication system                  | 4 | Supporting the provision of care and/or increasing service efficiency | Other - generic        | IT systems, eHealth and mHealth   |
| Stevens et al 1997 | Research | rhDNase                                                     | 2 | Treatment and management of symptoms and disease                      | IV - endocrine         | Drugs (not prophylactic vaccines) |
| Stevens et al 1997 | Research | Biomaterials in bone and joint replacement                  | 2 | Treatment and management of symptoms and disease                      | XIII - musculoskeletal | Devices and biomaterials          |
| Stevens et al 1997 | Research | Increased use of adjuvant chemotherapy in colorectal cancer | 2 | Treatment and management of symptoms and disease                      | II - cancers           | Drugs (not prophylactic vaccines) |
| Stevens et al 1997 | Research | Increased use of high purity factor                         | 2 | Treatment and management of                                           | III - blood            | Drugs (not prophylactic           |



## Appendix1: List of identified healthcare technologies

|                    |          |                                                |   |                                                                       |                        |                                   |
|--------------------|----------|------------------------------------------------|---|-----------------------------------------------------------------------|------------------------|-----------------------------------|
|                    |          | VIII and recombinant factor VIII in hemophilia |   | symptoms and disease                                                  |                        | vaccines)                         |
| Stevens et al 1997 | Research | Mirena intrauterine contraceptive device       | 2 | Health promotion and prevention of disease                            | XIV - genitourinary    | Drugs (not prophylactic vaccines) |
| Stevens et al 1997 | Research | Adjuvant chemotherapy in lung cancer           | 4 | Treatment and management of symptoms and disease                      | II - cancers           | Drugs (not prophylactic vaccines) |
| Stevens et al 1997 | Research | drugs for Alzheimer's disease                  | 6 | Treatment and management of symptoms and disease                      | V - mental health      | Drugs (not prophylactic vaccines) |
| Stevens et al 1997 | Research | Xenotransplantation                            | 6 | Treatment and management of symptoms and disease                      | Other - generic        | Regenerative medicine             |
| Stevens et al 1997 | Research | Screening for abdominal aortic aneurysm        | 6 | Health promotion and prevention of disease                            | IX - circulation       | Population programmes             |
| Stevens et al 1997 | Research | Remotely controlled robots (laboratory)        | 6 | Supporting the provision of care and/or increasing service efficiency | Other - generic        | Medical equipment                 |
| Stevens et al 1997 | Research | Gene therapy for cystic fibrosis               | 6 | Treatment and management of symptoms and disease                      | IV - endocrine         | Regenerative medicine             |
| Stevens et al 1997 | Research | New anesthetic vapors                          | 2 | Treatment and management of symptoms and disease                      | Other - generic        | Drugs (not prophylactic vaccines) |
| Stevens et al 1997 | Research | Magnetic resonance angiography                 | 4 | Diagnosis and monitoring of disease                                   | IX - circulation       | Diagnostic tests and imaging      |
| Stevens et al 1997 | Research | Digital radiography                            | 4 | Supporting the provision of care and/or increasing service efficiency | Other - generic        | IT systems, eHealth and mHealth   |
| Stevens et al 1997 | Research | Alendronate for osteoporosis                   | 2 | Treatment and management of symptoms and disease                      | XIII - musculoskeletal | Drugs (not prophylactic vaccines) |
| Stevens et al 1997 | Research | Continuous positive airways pressure           | 1 | Treatment and management of symptoms and disease                      | X - respiratory        | Non-surgical therapy              |

## Appendix1: List of identified healthcare technologies

|                        |                 |                                                                                       |    |                                                                         |                     |                                   |
|------------------------|-----------------|---------------------------------------------------------------------------------------|----|-------------------------------------------------------------------------|---------------------|-----------------------------------|
| Stevens et al 1997     | Research        | Expanding metal stents for esophageal cancer                                          | 1  | Treatment and management of symptoms and disease                        | II - cancers        | Devices and biomaterials          |
| Stevens et al 1997     | Research        | Community placements for severe mental illness                                        | 1  | Supporting patients receiving care (designed to be used by individuals) | V - mental health   | Organisational programmes         |
| Stevens et al 1997     | Research        | Fludarabine in lymphomas and chronic leukemias                                        | 2  | Treatment and management of symptoms and disease                        | II - cancers        | Drugs (not prophylactic vaccines) |
| Stevens et al 1997     | Research        | Combined therapy for HIV/AIDS                                                         | 2  | Treatment and management of symptoms and disease                        | I - infections      | Drugs (not prophylactic vaccines) |
| Stevens et al 1997     | Research        | Epilepsy surgery                                                                      | 1  | Treatment and management of symptoms and disease                        | VI - nervous        | Therapeutic procedures            |
| Stevens et al 1997     | Research        | Lipid-lowering drugs for elevated cholesterol                                         | 1  | Health promotion and prevention of disease                              | IX - circulation    | Drugs (not prophylactic vaccines) |
| Stevens et al 1997     | Research        | Repair of abdominal aortic aneurysm with transfemoral endovascular (bifurcated) graft | 4  | Treatment and management of symptoms and disease                        | IX - circulation    | Devices and biomaterials          |
| Stevens et al 1997     | Research        | Intracytoplasmic sperm injection                                                      | 2  | Treatment and management of symptoms and disease                        | XIV - genitourinary | Therapeutic procedures            |
| Stevens et al 1997     | Research        | Computed tomography (CT) scan advances                                                | 2  | Diagnosis and monitoring of disease                                     | Other - generic     | Diagnostic tests and imaging      |
| Stevens et al 1997     | Research        | Voice activated dictation technology                                                  | 1  | Supporting the provision of care and/or increasing service efficiency   | Other - generic     | Organisational programmes         |
| Stevens et al 1997     | Research        | Intra-arterial metallic stents                                                        | 1  | Treatment and management of symptoms and disease                        | IX - circulation    | Devices and biomaterials          |
| Tremblay and Yiu, 2006 | Policy planning | Hand-held robotic and remote ultrasound                                               | 14 | Diagnosis and monitoring of disease                                     | Other - generic     | Diagnostic tests and imaging      |
| Tremblay and Yiu, 2006 | Policy planning | MRI guided catheterization                                                            | 14 | Diagnosis and monitoring of disease                                     | IX - circulation    | Diagnostic tests and imaging      |

## Appendix1: List of identified healthcare technologies

|                        |                 |                                                                           |    |                                                                         |                              |                                 |
|------------------------|-----------------|---------------------------------------------------------------------------|----|-------------------------------------------------------------------------|------------------------------|---------------------------------|
| Tremblay and Yiu, 2006 | Policy planning | Image-guided therapy and surgery and robotics                             | 14 | Treatment and management of symptoms and disease                        | Other - generic              | Therapeutic procedures          |
| Tremblay and Yiu, 2006 | Policy planning | Computed Tomographic Colonography                                         | 14 | Diagnosis and monitoring of disease                                     | XI - GI tract, dental health | Diagnostic tests and imaging    |
| Tremblay and Yiu, 2006 | Policy planning | Digital Tomosynthesis                                                     | 14 | Diagnosis and monitoring of disease                                     | Other - generic              | Diagnostic tests and imaging    |
| Tremblay and Yiu, 2006 | Policy planning | Molecular-level imaging                                                   | 14 | Diagnosis and monitoring of disease                                     | Other - generic              | Diagnostic tests and imaging    |
| Tremblay and Yiu, 2006 | Policy planning | More economical scanners with improved image processing                   | 14 | Supporting the provision of care and/or increasing service efficiency   | Other - generic              | Medical equipment               |
| Tremblay and Yiu, 2006 | Policy planning | 4D imaging                                                                | 14 | Diagnosis and monitoring of disease                                     | Other - generic              | Diagnostic tests and imaging    |
| Tremblay and Yiu, 2006 | Policy planning | Faster cycle time to capture an image and general reduction in scan times | 14 | Supporting the provision of care and/or increasing service efficiency   | Other - generic              | Medical equipment               |
| Tremblay and Yiu, 2006 | Policy planning | Hybrid PET/CT increasingly replacing invasive procedures                  | 14 | Diagnosis and monitoring of disease                                     | Other - generic              | Diagnostic tests and imaging    |
| Tremblay and Yiu, 2006 | Policy planning | Stereotactic radio-surgery for early detection of coronary heart diseases | 14 | Diagnosis and monitoring of disease                                     | IX - circulation             | Diagnostic tests and imaging    |
| Tremblay and Yiu, 2006 | Policy planning | Magnetic Resonance Guided Focused Ultrasound for Imaging of inflammation  | 14 | Diagnosis and monitoring of disease                                     | Other - generic              | Diagnostic tests and imaging    |
| Tremblay and Yiu, 2006 | Policy planning | Wireless home-health monitoring                                           | 14 | Supporting patients receiving care (designed to be used by individuals) | Other - generic              | IT systems, eHealth and mHealth |
| Tremblay and Yiu, 2006 | Policy planning | E-health diagnostic platform                                              | 14 | Supporting the provision of care and/or increasing service efficiency   | Other - generic              | IT systems, eHealth and mHealth |
| Tremblay and Yiu, 2006 | Policy planning | Hand-held gamma camera                                                    | 14 | Diagnosis and monitoring of                                             | Other - generic              | Diagnostic tests and imaging    |

## Appendix1: List of identified healthcare technologies

|                        |                 |                                                            |    |                                                                       |                 |                                 |
|------------------------|-----------------|------------------------------------------------------------|----|-----------------------------------------------------------------------|-----------------|---------------------------------|
|                        |                 |                                                            |    | disease                                                               |                 |                                 |
| Tremblay and Yiu, 2006 | Policy planning | “one-stop” diagnosis and Therapeutic                       | 14 | Supporting the provision of care and/or increasing service efficiency | Other - generic | Organisational programmes       |
| Tremblay and Yiu, 2006 | Policy planning | customised hybrid systems for specific clinical situations | 14 | Unknown                                                               | Other - generic | Organisational programmes       |
| Tremblay and Yiu, 2006 | Policy planning | Near Infra-red Spectroscopy                                | 14 | Diagnosis and monitoring of disease                                   | Other - generic | Diagnostic tests and imaging    |
| Tremblay and Yiu, 2006 | Policy planning | Spatially-resolved Spectroscopy                            | 14 | Diagnosis and monitoring of disease                                   | Other - generic | Diagnostic tests and imaging    |
| Tremblay and Yiu, 2006 | Policy planning | Optical Coherence Tomography                               | 14 | Diagnosis and monitoring of disease                                   | Other - generic | Diagnostic tests and imaging    |
| Tremblay and Yiu, 2006 | Policy planning | Capsule Endoscopy                                          | 14 | Diagnosis and monitoring of disease                                   | Other - generic | Devices and biomaterials        |
| Tremblay and Yiu, 2006 | Policy planning | Tele-echography                                            | 14 | Supporting the provision of care and/or increasing service efficiency | Other - generic | IT systems, eHealth and mHealth |
| Tremblay and Yiu, 2006 | Policy planning | Tele-colposcopy                                            | 14 | Supporting the provision of care and/or increasing service efficiency | Other - generic | IT systems, eHealth and mHealth |
| Tremblay and Yiu, 2006 | Policy planning | Electronic Nose                                            | 14 | Diagnosis and monitoring of disease                                   | Other - generic | Diagnostic tests and imaging    |
| Tremblay and Yiu, 2006 | Policy planning | New contrast agents for Rubidium                           | 14 | Diagnosis and monitoring of disease                                   | Other - generic | Diagnostic tests and imaging    |
| Tremblay and Yiu, 2006 | Policy planning | Hyperpolarised gases                                       | 14 | Diagnosis and monitoring of disease                                   | Other - generic | Diagnostic tests and imaging    |
| Tremblay and Yiu, 2006 | Policy planning | Terahertz waves                                            | 14 | Diagnosis and monitoring of disease                                   | Other - generic | Diagnostic tests and imaging    |
| Tremblay and Yiu, 2006 | Policy planning | Microwaves, light spectrum                                 | 14 | Unknown                                                               | Other - generic | Devices and biomaterials        |
| Tremblay and Yiu, 2006 | Policy planning | Hyperpolarised imaging                                     | 14 | Diagnosis and monitoring of disease                                   | Other - generic | Diagnostic tests and imaging    |
| Tremblay and Yiu, 2006 | Policy planning | Specific advances in MRI, Ultrasound, Radiography...etc    | 14 | Diagnosis and monitoring of disease                                   | Other - generic | Diagnostic tests and imaging    |

## Appendix1: List of identified healthcare technologies

|                        |                 |                                                               |    |                                                                         |                     |                                   |
|------------------------|-----------------|---------------------------------------------------------------|----|-------------------------------------------------------------------------|---------------------|-----------------------------------|
| Tremblay and Yiu, 2006 | Policy planning | Reduction in use of invasive diagnostic procedures            | 14 | Supporting the provision of care and/or increasing service efficiency   | Other - generic     | Organisational programmes         |
| Tremblay and Yiu, 2006 | Policy planning | Diagnosis of kidney disorders without renal biopsy            | 14 | Diagnosis and monitoring of disease                                     | XIV - genitourinary | Unknown                           |
| Tremblay and Yiu, 2006 | Policy planning | Ex vivo molecular-computer diagnosis                          | 14 | Diagnosis and monitoring of disease                                     | Other - generic     | IT systems, eHealth and mHealth   |
| Tremblay and Yiu, 2006 | Policy planning | Smart-drug delivery systems                                   | 14 | Treatment and management of symptoms and disease                        | Other - generic     | Devices and biomaterials          |
| Tremblay and Yiu, 2006 | Policy planning | Polymer-encapsulated, bioconjugated quantum dots              | 9  | Diagnosis and monitoring of disease                                     | Other - generic     | Diagnostic tests and imaging      |
| Tremblay and Yiu, 2006 | Policy planning | Patient accessed universal health records                     | 4  | Supporting the provision of care and/or increasing service efficiency   | Other - generic     | Organisational programmes         |
| Tremblay and Yiu, 2006 | Policy planning | In silico-in vivo integration (lab on-a-chip)                 | 14 | Diagnosis and monitoring of disease                                     | Other - generic     | Diagnostic tests and imaging      |
| Tremblay and Yiu, 2006 | Policy planning | Wide deployment of non-invasive technologies and biosensors   | 9  | Supporting the provision of care and/or increasing service efficiency   | Other - generic     | Devices and biomaterials          |
| Tremblay and Yiu, 2006 | Policy planning | Direct consumer access to diagnostic tests                    | 6  | Supporting patients receiving care (designed to be used by individuals) | Other - generic     | Organisational programmes         |
| Tremblay and Yiu, 2006 | Policy planning | Molecular imaging with single molecular precision             | 9  | Diagnosis and monitoring of disease                                     | Other - generic     | Diagnostic tests and imaging      |
| Tremblay and Yiu, 2006 | Policy planning | diagnostic testing throughout the care pathway                | 7  | Supporting the provision of care and/or increasing service efficiency   | Other - generic     | Diagnostic tests and imaging      |
| Tremblay and Yiu, 2006 | Policy planning | Neuro-imaging at cellular level of brain processes (thoughts) | 14 | Diagnosis and monitoring of disease                                     | VI - nervous        | Diagnostic tests and imaging      |
| Tremblay and Yiu, 2006 | Policy planning | Molecular-computers used to design smart therapies            | 14 | Other                                                                   | Other - generic     | Drugs (not prophylactic vaccines) |

## Appendix1: List of identified healthcare technologies

|                        |                 |                                                                                                                 |    |                                                                         |                  |                                   |
|------------------------|-----------------|-----------------------------------------------------------------------------------------------------------------|----|-------------------------------------------------------------------------|------------------|-----------------------------------|
| Tremblay and Yiu, 2006 | Policy planning | Remote internet diagnosis based on data received from patient's home                                            | 9  | Supporting patients receiving care (designed to be used by individuals) | Other - generic  | IT systems, eHealth and mHealth   |
| Tremblay and Yiu, 2006 | Policy planning | Molecular diagnosis                                                                                             | 14 | Diagnosis and monitoring of disease                                     | Other - generic  | Diagnostic tests and imaging      |
| Tremblay and Yiu, 2006 | Policy planning | diagnostic -guided therapy for individualised medicine                                                          | 14 | Treatment and management of symptoms and disease                        | Other - generic  | Drugs (not prophylactic vaccines) |
| Tremblay and Yiu, 2006 | Policy planning | Computer-assisted diagnosis with pattern recognition                                                            | 14 | Diagnosis and monitoring of disease                                     | Other - generic  | IT systems, eHealth and mHealth   |
| Tremblay and Yiu, 2006 | Policy planning | Self-propelled micro-machines for diagnosis and Therapeutic                                                     | 9  | Unknown                                                                 | Other - generic  | Devices and biomaterials          |
| Tremblay and Yiu, 2006 | Policy planning | diagnostic bio-chip for cancer                                                                                  | 9  | Diagnosis and monitoring of disease                                     | II - cancers     | Diagnostic tests and imaging      |
| Tremblay and Yiu, 2006 | Policy planning | Investigation of thrombosis and vascular pathology using 3D tomography with remote controlled micro-instruments | 14 | Diagnosis and monitoring of disease                                     | IX - circulation | Devices and biomaterials          |
| Tremblay and Yiu, 2006 | Policy planning | Personal care nurse-robots                                                                                      | 12 | Supporting patients receiving care (designed to be used by individuals) | Other - generic  | Medical equipment                 |
| Tremblay and Yiu, 2006 | Policy planning | Functional combination of targeting and imaging                                                                 | 14 | Diagnosis and monitoring of disease                                     | Other - generic  | Diagnostic tests and imaging      |
| Tremblay and Yiu, 2006 | Policy planning | Intelligent and context sensitive clinical systems                                                              | 14 | Supporting the provision of care and/or increasing service efficiency   | Other - generic  | Organisational programmes         |
| Tremblay and Yiu, 2006 | Policy planning | Personal access to genomic information                                                                          | 14 | Supporting patients receiving care (designed to be used by individuals) | Other - generic  | Unknown                           |
| Tremblay and Yiu, 2006 | Policy planning | Development of effective gene                                                                                   | 9  | Treatment and management of                                             | Other - generic  | Regenerative medicine             |

## Appendix1: List of identified healthcare technologies

|                                                  |                 |                                                                                                                     |    |                                                  |                              |                                   |
|--------------------------------------------------|-----------------|---------------------------------------------------------------------------------------------------------------------|----|--------------------------------------------------|------------------------------|-----------------------------------|
|                                                  |                 | therapies                                                                                                           |    | symptoms and disease                             |                              |                                   |
| Science & Technology Foresight survey Japan 1997 | Policy planning | Widespread use of scientific guidelines for adult-disease-preventing lifestyles (nutrition, rest and exercise)      | 9  | Health promotion and prevention of disease       | Other - generic              | Organisational programmes         |
| Science & Technology Foresight survey Japan 1997 | Policy planning | Practical use of chemotherapy that brings complete remission to digestive organ cancer with low drug-responsiveness | 18 | Treatment and management of symptoms and disease | II - cancers                 | Drugs (not prophylactic vaccines) |
| Science & Technology Foresight survey Japan 1997 | Policy planning | Widespread use of techniques to overcome the drug resistance of malignant tumours                                   | 16 | Treatment and management of symptoms and disease | II - cancers                 | Drugs (not prophylactic vaccines) |
| Science & Technology Foresight survey Japan 1997 | Policy planning | Widespread use of drugs that cure viral liver disease                                                               | 13 | Treatment and management of symptoms and disease | XI - GI tract, dental health | Drugs (not prophylactic vaccines) |
| Science & Technology Foresight survey Japan 1997 | Policy planning | Widespread use of biological and immunological therapy effective for cancer                                         | 14 | Treatment and management of symptoms and disease | II - cancers                 | Drugs (not prophylactic vaccines) |
| Science & Technology Foresight survey Japan 1997 | Policy planning | Development of effective methods of preventing Alzheimer's disease                                                  | 16 | Health promotion and prevention of disease       | V - mental health            | Unknown                           |
| Science & Technology Foresight survey Japan 1997 | Policy planning | Possible to cure allergic diseases                                                                                  | 21 | Treatment and management of symptoms and disease | III - blood                  | Unknown                           |
| Science & Technology Foresight survey Japan 1997 | Policy planning | Development of an HIV vaccine                                                                                       | 10 | Health promotion and prevention of disease       | I - infections               | Prophylactic vaccines             |
| Science & Technology Foresight survey Japan 1997 | Policy planning | Widespread use of gene therapy against malignant tumors                                                             | 17 | Treatment and management of symptoms and disease | II - cancers                 | Regenerative medicine             |

## Appendix1: List of identified healthcare technologies

|                                                  |                 |                                                                                                                          |    |                                                  |                              |                                   |
|--------------------------------------------------|-----------------|--------------------------------------------------------------------------------------------------------------------------|----|--------------------------------------------------|------------------------------|-----------------------------------|
| Science & Technology Foresight survey Japan 1997 | Policy planning | Widespread use of prevention methods for the contraction of diabetic complications                                       | 11 | Health promotion and prevention of disease       | IV - endocrine               | Unknown                           |
| Science & Technology Foresight survey Japan 1997 | Policy planning | Practical use of anti-AIDS therapy                                                                                       | 12 | Treatment and management of symptoms and disease | I - infections               | Drugs (not prophylactic vaccines) |
| Science & Technology Foresight survey Japan 1997 | Policy planning | Widespread use of an early cancer diagnosis technique based on biochemical examination                                   | 10 | Diagnosis and monitoring of disease              | II - cancers                 | Diagnostic tests and imaging      |
| Science & Technology Foresight survey Japan 1997 | Policy planning | Widespread use of a technique to eliminate viruses from blood                                                            | 12 | Treatment and management of symptoms and disease | I - infections               | Therapeutic procedures            |
| Science & Technology Foresight survey Japan 1997 | Policy planning | Practical use of prevention methods for stress-induced mental disorders                                                  | 14 | Health promotion and prevention of disease       | V - mental health            | Unknown                           |
| Science & Technology Foresight survey Japan 1997 | Policy planning | Practical use of a method to quantitatively assess the level of aging (biological age) in relation to chronological age. | 9  | Diagnosis and monitoring of disease              | Other - generic              | Unknown                           |
| Science & Technology Foresight survey Japan 1997 | Policy planning | Practical use of a preventive measure against diabetic complications.                                                    | 14 | Health promotion and prevention of disease       | IV - endocrine               | Unknown                           |
| Science & Technology Foresight survey Japan 1997 | Policy planning | Widespread use of presbyopia prevention methods                                                                          | 29 | Health promotion and prevention of disease       | VII - eye                    | Unknown                           |
| Science & Technology Foresight survey Japan 1997 | Policy planning | Widespread use of a laser-applied tooth decay treatment method                                                           | 14 | Treatment and management of symptoms and disease | XI - GI tract, dental health | Devices and biomaterials          |
| Science & Technology Foresight survey Japan 1997 | Policy planning | Widespread method of prevention against a premature delivery through                                                     | 8  | Health promotion and prevention of disease       | XV - pregnancy               | Organisational programmes         |



## Appendix1: List of identified healthcare technologies

|                                                  |                 |                                                                                                          |    |                                            |                   |                              |
|--------------------------------------------------|-----------------|----------------------------------------------------------------------------------------------------------|----|--------------------------------------------|-------------------|------------------------------|
|                                                  |                 | the progression of management system of fetal information.                                               |    |                                            |                   |                              |
| Science & Technology Foresight survey Japan 1997 | Policy planning | Practical use of the prevention against congenital anomaly originating in the embryonic or fetal period. | 19 | Health promotion and prevention of disease | XV - pregnancy    | Unknown                      |
| Science & Technology Foresight survey Japan 1997 | Policy planning | Widespread use of preventive measure for cerebral palsy                                                  | 19 | Health promotion and prevention of disease | VI - nervous      | Unknown                      |
| Science & Technology Foresight survey Japan 1997 | Policy planning | Widespread use of a cancer spread diagnosis technique based on 3-D imaging.                              | 7  | Diagnosis and monitoring of disease        | II - cancers      | Diagnostic tests and imaging |
| Science & Technology Foresight survey Japan 1997 | Policy planning | Widespread use of a cancer risk assessment technique based on genetic analysis.                          | 11 | Diagnosis and monitoring of disease        | II - cancers      | Unknown                      |
| Science & Technology Foresight survey Japan 1997 | Policy planning | Widespread use of against of cancer cells drug sensitivity measurement method.                           | 9  | Unknown                                    | II - cancers      | Unknown                      |
| Science & Technology Foresight survey Japan 1997 | Policy planning | Widespread use of automatic testing equipment for cancer cytodiagnosis.                                  | 9  | Diagnosis and monitoring of disease        | II - cancers      | Diagnostic tests and imaging |
| Science & Technology Foresight survey Japan 1997 | Policy planning | Practical use of classification and stage determination of schizophrenia based on diagnostic imaging.    | 24 | Diagnosis and monitoring of disease        | V - mental health | Diagnostic tests and imaging |
| Science & Technology Foresight survey Japan 1997 | Policy planning | Practical use of diagnosing methods for determining the level and spread of arteriosclerosis             | 9  | Diagnosis and monitoring of disease        | IX - circulation  | Diagnostic tests and imaging |

## Appendix1: List of identified healthcare technologies

|                                                  |                 |                                                                                                                    |    |                                                                       |                              |                                   |
|--------------------------------------------------|-----------------|--------------------------------------------------------------------------------------------------------------------|----|-----------------------------------------------------------------------|------------------------------|-----------------------------------|
|                                                  |                 | focused by a non-invasive process                                                                                  |    |                                                                       |                              |                                   |
| Science & Technology Foresight survey Japan 1997 | Policy planning | Establishment of a correct diagnostic measure for kidney diseases without renal biopsy.                            | 19 | Diagnosis and monitoring of disease                                   | XIV - genitourinary          | Diagnostic tests and imaging      |
| Science & Technology Foresight survey Japan 1997 | Policy planning | Development of a capsule-type total gastro-intestinal tract monitoring system.                                     | 6  | Diagnosis and monitoring of disease                                   | XI - GI tract, dental health | Devices and biomaterials          |
| Science & Technology Foresight survey Japan 1997 | Policy planning | Practical use of specialist-level medical diagnosis assistance systems.                                            | 9  | Supporting the provision of care and/or increasing service efficiency | Other - generic              | IT systems, eHealth and mHealth   |
| Science & Technology Foresight survey Japan 1997 | Policy planning | Development of non-invasive cell-level diagnostic imaging.                                                         | 8  | Diagnosis and monitoring of disease                                   | Other - generic              | Diagnostic tests and imaging      |
| Science & Technology Foresight survey Japan 1997 | Policy planning | Practical use of a non-invasive technique to obtain blood biochemical examination data using body surface sensors. | 9  | Diagnosis and monitoring of disease                                   | III - blood                  | Devices and biomaterials          |
| Science & Technology Foresight survey Japan 1997 | Policy planning | Practical use of a rapid diagnostic method for rejection in organ and tissue transplantation.                      | 6  | Diagnosis and monitoring of disease                                   | III - blood                  | Unknown                           |
| Science & Technology Foresight survey Japan 1997 | Policy planning | Widespread use of malaria vaccines.                                                                                | 10 | Health promotion and prevention of disease                            | I - infections               | Prophylactic vaccines             |
| Science & Technology Foresight survey Japan 1997 | Policy planning | Development of an effective insulin that can be administered orally.                                               | 16 | Treatment and management of symptoms and disease                      | IV - endocrine               | Drugs (not prophylactic vaccines) |
| Science & Technology Foresight survey Japan 1997 | Policy planning | Practical use of gene therapy for diabetes.                                                                        | 16 | Treatment and management of symptoms and disease                      | IV - endocrine               | Regenerative medicine             |

## Appendix1: List of identified healthcare technologies

|                                                  |                 |                                                                                                                                                              |    |                                                  |                        |                                   |
|--------------------------------------------------|-----------------|--------------------------------------------------------------------------------------------------------------------------------------------------------------|----|--------------------------------------------------|------------------------|-----------------------------------|
| Science & Technology Foresight survey Japan 1997 | Policy planning | Widespread use of gene therapy for familial hypercholesterolemia.                                                                                            | 14 | Treatment and management of symptoms and disease | IX - circulation       | Regenerative medicine             |
| Science & Technology Foresight survey Japan 1997 | Policy planning | Development of radiosensitizers effective in cancer treatment.                                                                                               | 8  | Treatment and management of symptoms and disease | II - cancers           | Therapeutic procedures            |
| Science & Technology Foresight survey Japan 1997 | Policy planning | Widespread use of heavy particle against cancer                                                                                                              | 14 | Treatment and management of symptoms and disease | II - cancers           | Non-surgical therapy              |
| Science & Technology Foresight survey Japan 1997 | Policy planning | Development of a technique to cause drug delivery to targeted sites in the brain.                                                                            | 19 | Treatment and management of symptoms and disease | Other - generic        | Drugs (not prophylactic vaccines) |
| Science & Technology Foresight survey Japan 1997 | Policy planning | Practical use of a safe pain control method without side effects                                                                                             | 12 | Treatment and management of symptoms and disease | Other - generic        | Unknown                           |
| Science & Technology Foresight survey Japan 1997 | Policy planning | Widespread use of gene therapy for muscular dystrophy.                                                                                                       | 24 | Treatment and management of symptoms and disease | VI - nervous           | Regenerative medicine             |
| Science & Technology Foresight survey Japan 1997 | Policy planning | Development of effective treatment for amyotrophic lateral sclerosis.                                                                                        | 31 | Treatment and management of symptoms and disease | VI - nervous           | Unknown                           |
| Science & Technology Foresight survey Japan 1997 | Policy planning | Practical use of artificial muscles for limbs.                                                                                                               | 21 | Rehabilitation                                   | XXI - screening, rehab | Devices and biomaterials          |
| Science & Technology Foresight survey Japan 1997 | Policy planning | Practical use of a technique to induce the differentiation of fibroblasts into cardiac muscle and its application to the treatment of myocardial infarction. | 20 | Treatment and management of symptoms and disease | IX - circulation       | Regenerative medicine             |
| Science & Technology Foresight survey Japan 1997 | Policy planning | Development of hybrid-type artificial endocrine organs in which living                                                                                       | 11 | Treatment and management of symptoms and disease | IV - endocrine         | Regenerative medicine             |

## Appendix1: List of identified healthcare technologies

|                                                  |                 |                                                                                                                                                    |    |                                                  |                              |                          |
|--------------------------------------------------|-----------------|----------------------------------------------------------------------------------------------------------------------------------------------------|----|--------------------------------------------------|------------------------------|--------------------------|
|                                                  |                 | cells and artificial objects coexist.                                                                                                              |    |                                                  |                              |                          |
| Science & Technology Foresight survey Japan 1997 | Policy planning | Widespread use of functional blood purifiers that selectively remove specified components from blood                                               | 19 | Treatment and management of symptoms and disease | III - blood                  | Devices and biomaterials |
| Science & Technology Foresight survey Japan 1997 | Policy planning | Widespread use of artificial hemoglobin as a red blood cell substitute.                                                                            | 15 | Treatment and management of symptoms and disease | III - blood                  | Regenerative medicine    |
| Science & Technology Foresight survey Japan 1997 | Policy planning | Development of fully implanted artificial heart                                                                                                    | 14 | Treatment and management of symptoms and disease | IX - circulation             | Devices and biomaterials |
| Science & Technology Foresight survey Japan 1997 | Policy planning | Practical use of fully implanted artificial lungs.                                                                                                 | 29 | Treatment and management of symptoms and disease | X - respiratory              | Devices and biomaterials |
| Science & Technology Foresight survey Japan 1997 | Policy planning | Practical use of fully implanted artificial kidneys                                                                                                | 26 | Treatment and management of symptoms and disease | XIV - genitourinary          | Devices and biomaterials |
| Science & Technology Foresight survey Japan 1997 | Policy planning | Practical use of fully implanted artificial pancreas                                                                                               | 12 | Treatment and management of symptoms and disease | XI - GI tract, dental health | Devices and biomaterials |
| Science & Technology Foresight survey Japan 1997 | Policy planning | Widespread use of prevention and treatment methods for tooth decay and periodontitis to ensure the retention of 20 or more teeth at 80 year of age | 14 | Health promotion and prevention of disease       | XI - GI tract, dental health | Population programmes    |
| Science & Technology Foresight survey Japan 1997 | Policy planning | Widespread use of a technique to store, cultivate and transplant one's own tissues.                                                                | 15 | Treatment and management of symptoms and disease | Other - generic              | Regenerative medicine    |
| Science & Technology Foresight survey Japan 1997 | Policy planning | Practical use of implanted bladder control devices                                                                                                 | 12 | Treatment and management of symptoms and disease | XIV - genitourinary          | Devices and biomaterials |

## Appendix1: List of identified healthcare technologies

|                                                  |                 |                                                                                                                        |    |                                                                         |                        |                           |
|--------------------------------------------------|-----------------|------------------------------------------------------------------------------------------------------------------------|----|-------------------------------------------------------------------------|------------------------|---------------------------|
| Science & Technology Foresight survey Japan 1997 | Policy planning | Practical use of gene therapy for genetic disorders                                                                    | 19 | Treatment and management of symptoms and disease                        | Other - generic        | Regenerative medicine     |
| Science & Technology Foresight survey Japan 1997 | Policy planning | Availability of genetherapy based on oral delivery                                                                     | 24 | Treatment and management of symptoms and disease                        | Other - generic        | Regenerative medicine     |
| Science & Technology Foresight survey Japan 1997 | Policy planning | Practical use of heterogeneous organ transplantation as means of treatment.                                            | 21 | Treatment and management of symptoms and disease                        | Other - generic        | Therapeutic procedures    |
| Science & Technology Foresight survey Japan 1997 | Policy planning | Widespread use of a worldwide organ supply system                                                                      | 12 | Supporting the provision of care and/or increasing service efficiency   | Other - generic        | Organisational programmes |
| Science & Technology Foresight survey Japan 1997 | Policy planning | Development of a partial tissue destruction method non-invasive to the living body.                                    | 6  | Treatment and management of symptoms and disease                        | Other - generic        | Non-surgical therapy      |
| Science & Technology Foresight survey Japan 1997 | Policy planning | Practical use of implanted artificial cochleas effective for both conductive hearing loss and perceptive hearing loss. | 14 | Rehabilitation                                                          | VIII - ear             | Devices and biomaterials  |
| Science & Technology Foresight survey Japan 1997 | Policy planning | Development of a device to sense the needs of demented aged people.                                                    | 21 | Supporting patients receiving care (designed to be used by individuals) | V - mental health      | Devices and biomaterials  |
| Science & Technology Foresight survey Japan 1997 | Policy planning | Development of controlling devices which help the cooperative muscular actions enabling object-oriented movement.      | 14 | Rehabilitation                                                          | XXI - screening, rehab | Devices and biomaterials  |
| Science & Technology Foresight survey Japan 1997 | Policy planning | Widespread use of artificial legs featuring a small power source and computer control.                                 | 11 | Rehabilitation                                                          | XXI - screening, rehab | Devices and biomaterials  |

## Appendix1: List of identified healthcare technologies

|                                                  |                 |                                                                                                                                                           |    |                                                                         |                 |                                 |
|--------------------------------------------------|-----------------|-----------------------------------------------------------------------------------------------------------------------------------------------------------|----|-------------------------------------------------------------------------|-----------------|---------------------------------|
| Science & Technology Foresight survey Japan 1997 | Policy planning | Practical use of a blood cell production and supply technique based on industrial-scale cultivation.                                                      | 15 | Treatment and management of symptoms and disease                        | III - blood     | Regenerative medicine           |
| Science & Technology Foresight survey Japan 1997 | Policy planning | Practical use of systems for monitoring health condition and providing information for an appropriate diagnosis at home in event of accident or diseases. | 11 | Supporting patients receiving care (designed to be used by individuals) | XIX - injury    | IT systems, eHealth and mHealth |
| Science & Technology Foresight survey Japan 1997 | Policy planning | Widespread use of portable conversational speech interpretation systems.                                                                                  | 24 | Unknown                                                                 | Other - generic | IT systems, eHealth and mHealth |
| Science & Technology Foresight survey Japan 1997 | Policy planning | Widespread use of robots that care for people with severe physical and mental disabilities.                                                               | 12 | Supporting patients receiving care (designed to be used by individuals) | Other - generic | Medical equipment               |
| Science & Technology Foresight survey Japan 1997 | Policy planning | Advancements in patient and hospital information management, leading to a reduction in waiting time at Japanese hospitals to 15 minutes or less.          | 7  | Supporting the provision of care and/or increasing service efficiency   | Other - generic | Organisational programmes       |
| Science & Technology Foresight survey Japan 1997 | Policy planning | Practical use in Japan of an ID card system that thoroughly covers an individual's health conditions and medical data.                                    | 9  | Supporting the provision of care and/or increasing service efficiency   | Other - generic | Organisational programmes       |
| Science & Technology Foresight survey            | Policy planning | Elucidation of the biological clock, leading to drug                                                                                                      | 9  | Supporting patients receiving care (designed to                         | Other - generic | Unknown                         |

## Appendix1: List of identified healthcare technologies

|                                                  |                 |                                                                                                           |    |                                                  |                 |                                   |
|--------------------------------------------------|-----------------|-----------------------------------------------------------------------------------------------------------|----|--------------------------------------------------|-----------------|-----------------------------------|
| Japan 1997                                       |                 | administration that takes it into consideration                                                           |    | be used by individuals)                          |                 |                                   |
| Science & Technology Foresight survey Japan 1997 | Policy planning | Practical application of the production of artificial cells with organ characteristics.                   | 29 | Treatment and management of symptoms and disease | Other - generic | Regenerative medicine             |
| Science & Technology Foresight survey Japan 1997 | Policy planning | Practical use of anti-AIDS therapy                                                                        | 12 | Treatment and management of symptoms and disease | I - infections  | Drugs (not prophylactic vaccines) |
| Science & Technology Foresight survey Japan 1997 | Policy planning | Practical use of a rapid diagnostic method for rejection in organ and tissue transplantation              | 10 | Diagnosis and monitoring of disease              | Other - generic | Diagnostic tests and imaging      |
| Science & Technology Foresight survey Japan 1997 | Policy planning | Development of anti-cancer agents which target the manifestation functions of cancer genes                | 10 | Treatment and management of symptoms and disease | II - cancers    | Drugs (not prophylactic vaccines) |
| Science & Technology Foresight survey Japan 1997 | Policy planning | Utilization of information about the gene structure of each individual patient in diagnosis and treatment | 16 | Diagnosis and monitoring of disease              | Other - generic | Organisational programmes         |
| Science & Technology Foresight survey Japan 1997 | Policy planning | Development of technology to regenerate organs or individuals from separated animal cells                 | 20 | Treatment and management of symptoms and disease | Other - generic | Regenerative medicine             |
| Science & Technology Foresight survey Japan 1997 | Policy planning | Practical use of methods for directly determining DNA sequences by physical means such as X-rays.         | 14 | Diagnosis and monitoring of disease              | Other - generic | Diagnostic tests and imaging      |
| Science & Technology Foresight survey Japan 1997 | Policy planning | Control of signal transduction in the carcinogenesis of cells, and widespread use of treatment            | 20 | Treatment and management of symptoms and disease | II - cancers    | Drugs (not prophylactic vaccines) |

## Appendix1: List of identified healthcare technologies

|                                                  |                 |                                                                                                                                                                                                                |    |                                                  |                 |                                   |
|--------------------------------------------------|-----------------|----------------------------------------------------------------------------------------------------------------------------------------------------------------------------------------------------------------|----|--------------------------------------------------|-----------------|-----------------------------------|
|                                                  |                 | methods for dysdifferentiating carcinogenic cells.                                                                                                                                                             |    |                                                  |                 |                                   |
| Science & Technology Foresight survey Japan 1997 | Policy planning | Complete understanding of the factors contributing to stem cell multiplication, and widespread use of the practice of multiplying stem cells, as necessary, in test tubes and using them for treatment purpose | 15 | Treatment and management of symptoms and disease | Other - generic | Regenerative medicine             |
| Science & Technology Foresight survey Japan 1997 | Policy planning | Development of technology capable of synthesizing living cells by using only artificially produced chemical compounds.                                                                                         | 31 | Treatment and management of symptoms and disease | Other - generic | Regenerative medicine             |
| Science & Technology Foresight survey Japan 1997 | Policy planning | Practical use of elementary particle beam technology in genetic engineering.                                                                                                                                   | 19 | Treatment and management of symptoms and disease | Other - generic | Regenerative medicine             |
| Science & Technology Foresight survey Japan 1997 | Policy planning | Development of drugs capable of preventing the occurrence of certain types of cancer.                                                                                                                          | 11 | Health promotion and prevention of disease       | II - cancers    | Drugs (not prophylactic vaccines) |
| Science & Technology Foresight survey Japan 1997 | Policy planning | Practical use of effective means to prevent metastasis of cancer.                                                                                                                                              | 14 | Treatment and management of symptoms and disease | II - cancers    | Unknown                           |
| Science & Technology Foresight survey Japan 1997 | Policy planning | Widespread use of technologies for long-term (semi-permanent) culturing and preservation of                                                                                                                    | 19 | Treatment and management of symptoms and disease | Other - generic | Regenerative medicine             |



## Appendix1: List of identified healthcare technologies

|                                                  |                 |                                                                                                                    |    |                                                  |                        |                                 |
|--------------------------------------------------|-----------------|--------------------------------------------------------------------------------------------------------------------|----|--------------------------------------------------|------------------------|---------------------------------|
|                                                  |                 | organs.                                                                                                            |    |                                                  |                        |                                 |
| Science & Technology Foresight survey Japan 1997 | Policy planning | Practical use of artificial organs (pancreases, kidneys, livers, etc.) incorporating human cells and tissues       | 14 | Treatment and management of symptoms and disease | Other - generic        | Regenerative medicine           |
| Science & Technology Foresight survey Japan 1997 | Policy planning | Development of an entirely implantable artificial kidney.                                                          | 18 | Treatment and management of symptoms and disease | XIV - genitourinary    | Regenerative medicine           |
| Science & Technology Foresight survey Japan 1997 | Policy planning | Development of an artificial cornea, allowing the visually impaired to regain their sight.                         | 25 | Treatment and management of symptoms and disease | VII - eye              | Devices and biomaterials        |
| Science & Technology Foresight survey Japan 1997 | Policy planning | Development of artificial muscle elements.                                                                         | 21 | Treatment and management of symptoms and disease | Other - generic        | Regenerative medicine           |
| Science & Technology Foresight survey Japan 1997 | Policy planning | Establishment of interface technology between neural information and artificial organism structures.               | 25 | Treatment and management of symptoms and disease | VI - nervous           | Medical equipment               |
| Science & Technology Foresight survey Japan 1997 | Policy planning | Development of neural-computers with new logic structures modeled on brain functions.                              | 24 | Unknown                                          | VI - nervous           | IT systems, eHealth and mHealth |
| Science & Technology Foresight survey Japan 1997 | Policy planning | Development of interfaces enabling direct linkage between the computer and the brain.                              | 21 | Treatment and management of symptoms and disease | XXI - screening, rehab | Devices and biomaterials        |
| Science & Technology Foresight survey Japan 1997 | Policy planning | Development of electric circuits with similar self-organization and self-restoration functions as neural networks. | 14 | Treatment and management of symptoms and disease | VI - nervous           | Devices and biomaterials        |

## Appendix1: List of identified healthcare technologies

|                                                  |                 |                                                                                                                                           |    |                                                                       |                              |                                   |
|--------------------------------------------------|-----------------|-------------------------------------------------------------------------------------------------------------------------------------------|----|-----------------------------------------------------------------------|------------------------------|-----------------------------------|
| Science & Technology Foresight survey Japan 1997 | Policy planning | Development of diagnostic and medical treatment micromachines capable of traveling on their own inside organisms (body cavity organs).    | 24 | Diagnosis and monitoring of disease                                   | Other - generic              | Devices and biomaterials          |
| Science & Technology Foresight survey Japan 1997 | Policy planning | Widespread use of remote surgery systems utilizing virtual reality technology.                                                            | 14 | Supporting the provision of care and/or increasing service efficiency | Other - generic              | IT systems, eHealth and mHealth   |
| Science & Technology Foresight survey Japan 1997 | Policy planning | Widespread use of vicarious experience devices (using virtual reality technology) which allow bed-ridden patients to take vacations, etc. | 9  | Rehabilitation                                                        | XXI - screening, rehab       | IT systems, eHealth and mHealth   |
| Science & Technology Foresight survey Japan 1997 | Policy planning | Widespread use of methods for controlling the immune system locally                                                                       | 14 | Treatment and management of symptoms and disease                      | III - blood                  | Unknown                           |
| Science & Technology Foresight survey Japan 1997 | Policy planning | Development of effective Therapeutic for amyotrophic lateral sclerosis                                                                    | 21 | Treatment and management of symptoms and disease                      | VI - nervous                 | Drugs (not prophylactic vaccines) |
| Science & Technology Foresight survey Japan 1997 | Policy planning | Practical use of batteries of artificial organs implanted in the living body                                                              | 17 | Treatment and management of symptoms and disease                      | Other - generic              | Devices and biomaterials          |
| Science & Technology Foresight survey Japan 1997 | Policy planning | Development of artificial liver (external devices supporting liver functions) usable on a long-term, continuous basis                     | 19 | Treatment and management of symptoms and disease                      | XI - GI tract, dental health | Devices and biomaterials          |
| Science & Technology Foresight survey Japan 1997 | Policy planning | Practical use of heterogeneous organ transplantation as means of Therapeutic                                                              | 19 | Treatment and management of symptoms and disease                      | Other - generic              | Therapeutic procedures            |

## Appendix1: List of identified healthcare technologies

|                                                  |                 |                                                                                                                                                                                                                                           |    |                                                                         |                 |                                 |
|--------------------------------------------------|-----------------|-------------------------------------------------------------------------------------------------------------------------------------------------------------------------------------------------------------------------------------------|----|-------------------------------------------------------------------------|-----------------|---------------------------------|
| Science & Technology Foresight survey Japan 1997 | Policy planning | Development of artificial eyes featuring electronic circuitry that can be connected to nerve and brain cells                                                                                                                              | 24 | Rehabilitation                                                          | VII - eye       | Devices and biomaterials        |
| Science & Technology Foresight survey Japan 1997 | Policy planning | Development of methods for recombining disconnected central nerves                                                                                                                                                                        | 29 | Rehabilitation                                                          | VI - nervous    | Therapeutic procedures          |
| Loveridge et al 1998                             | Policy planning | Practical use of directly visualising molecular structure at an atomic level (e.g. ultramicroscopy)                                                                                                                                       | 21 | Diagnosis and monitoring of disease                                     | Other - generic | Diagnostic tests and imaging    |
| Loveridge et al 1998                             | Policy planning | At least 3 common diseases will be treated by portable or implanted systems that combine individually tailored drug delivery with automatic feedback control from a devices continuously monitoring the condition (e.g. diabetes control) | 21 | Treatment and management of symptoms and disease                        | Other - generic | Devices and biomaterials        |
| Loveridge et al 1998                             | Policy planning | Over-the-counter nucleic acid-based tests suitable for self-administration become available for the first time                                                                                                                            | 21 | Supporting patients receiving care (designed to be used by individuals) | Other - generic | IT systems, eHealth and mHealth |
| Loveridge et al 1998                             | Policy planning | Results of more than 50% of all types of diagnostic tests are available at the point of need within one hour                                                                                                                              | 21 | Diagnosis and monitoring of disease                                     | Other - generic | Diagnostic tests and imaging    |

## Appendix1: List of identified healthcare technologies

|                      |                 |                                                                                                                        |    |                                                  |                 |                                   |
|----------------------|-----------------|------------------------------------------------------------------------------------------------------------------------|----|--------------------------------------------------|-----------------|-----------------------------------|
| Loveridge et al 1998 | Policy planning | Widespread use of real time 3-D high resolution imaging of physiological and metabolic functions                       | 21 | Diagnosis and monitoring of disease              | Other - generic | Diagnostic tests and imaging      |
| Loveridge et al 1998 | Policy planning | First practical use of non-invasive spectroscopy for in situ chemical pathology                                        | 21 | Diagnosis and monitoring of disease              | Other - generic | Diagnostic tests and imaging      |
| Loveridge et al 1998 | Policy planning | Practical use of biosensors in a wide range of medical manufacturing and environmental applications                    | 21 | Unknown                                          | Other - generic | Devices and biomaterials          |
| Loveridge et al 1998 | Policy planning | All common single genes diseases can be treated successfully by gene therapy                                           | 21 | Treatment and management of symptoms and disease | Other - generic | Drugs (not prophylactic vaccines) |
| Loveridge et al 1998 | Policy planning | Practical use of gene therapy is extended to the treatment of 30% of major life threatening diseases                   | 21 | Treatment and management of symptoms and disease | Other - generic | Drugs (not prophylactic vaccines) |
| Loveridge et al 1998 | Policy planning | Nucleic acid based diagnostic techniques account for 10% of all diagnostic work load                                   | 21 | Diagnosis and monitoring of disease              | Other - generic | Organisational programmes         |
| Loveridge et al 1998 | Policy planning | First practical use of therapies based on purpose-designed non-peptide molecules which mimic the activity of peptides. | 21 | Treatment and management of symptoms and disease | Other - generic | Drugs (not prophylactic vaccines) |
| Loveridge et al 1998 | Policy planning | Widespread use of polypeptide drugs which are delivered orally and targeted to                                         | 21 | Treatment and management of symptoms and disease | Other - generic | Drugs (not prophylactic vaccines) |

## Appendix1: List of identified healthcare technologies

|                      |                 |                                                                                                                                                          |    |                                                  |                  |                                   |
|----------------------|-----------------|----------------------------------------------------------------------------------------------------------------------------------------------------------|----|--------------------------------------------------|------------------|-----------------------------------|
|                      |                 | specific tissues                                                                                                                                         |    |                                                  |                  |                                   |
| Loveridge et al 1998 | Policy planning | Widespread use of cosmeceuticals with scientifically proven effectiveness to treat the symptoms of skin ageing (e.g. wrinkles)                           | 21 | Health promotion and prevention of disease       | XII - skin       | Drugs (not prophylactic vaccines) |
| Loveridge et al 1998 | Policy planning | Widespread use of improved technologies for early diagnosis increases the 5-year survival rate of cancer patients by 50%                                 | 21 | Diagnosis and monitoring of disease              | II - cancers     | Diagnostic tests and imaging      |
| Loveridge et al 1998 | Policy planning | Practical use of drugs modulating cellular systems to treat cancer                                                                                       | 21 | Treatment and management of symptoms and disease | II - cancers     | Drugs (not prophylactic vaccines) |
| Loveridge et al 1998 | Policy planning | Widespread use of nutritional supplements or special diets based on an understanding of the role of nutrients such as anti-oxidants in cancer prevention | 21 | Health promotion and prevention of disease       | II - cancers     | Population programmes             |
| Loveridge et al 1998 | Policy planning | Practical use of substances that contain rather eliminate cancer (e.g. use agents that control metastasis)                                               | 21 | Treatment and management of symptoms and disease | II - cancers     | Drugs (not prophylactic vaccines) |
| Loveridge et al 1998 | Policy planning | New methods of treating arterial occlusion and myocardial infarction dramatically reduce morbidity from cardiovascular diseases in 40-50 age group       | 21 | Treatment and management of symptoms and disease | IX - circulation | Unknown                           |

## Appendix1: List of identified healthcare technologies

|                      |                 |                                                                                                                                          |    |                                                  |                   |                         |
|----------------------|-----------------|------------------------------------------------------------------------------------------------------------------------------------------|----|--------------------------------------------------|-------------------|-------------------------|
| Loveridge et al 1998 | Policy planning | 50% of the UK population receive individual risk assessment for cardiovascular disease based on genetic screening and lifestyle measures | 21 | Health promotion and prevention of disease       | IX - circulation  | Population programmes   |
| Loveridge et al 1998 | Policy planning | Understanding the immune system is sufficiently developed to allow routine transplantation without the use of immuno-suppression         | 21 | Treatment and management of symptoms and disease | III - blood       | Therapeutic procedures  |
| Loveridge et al 1998 | Policy planning | Practical use of xenotransplantation of organs from animals to human                                                                     | 21 | Treatment and management of symptoms and disease | Other - generic   | Regenerative medicine   |
| Loveridge et al 1998 | Policy planning | Incidence of each of the 3 major viral diseases is reduced by 90% by new vaccines or drug development                                    | 21 | Health promotion and prevention of disease       | I - infections    | Prophylactic vaccines   |
| Loveridge et al 1998 | Policy planning | Practical use of technologies for oral administration of multi-valent vaccines for the most important childhood illnesses                | 21 | Health promotion and prevention of disease       | I - infections    | Prophylactic vaccines   |
| Loveridge et al 1998 | Policy planning | Widespread introduction of malaria vaccine reduces the worldwide incidence of the diseases by 50%                                        | 21 | Health promotion and prevention of disease       | I - infections    | Prophylactic vaccines   |
| Loveridge et al 1998 | Policy planning | First effective vaccine of HIV becomes available                                                                                         | 21 | Health promotion and prevention of disease       | I - infections    | Prophylactic vaccines   |
| Loveridge et al 1998 | Policy planning | Development of drugs with proven                                                                                                         | 21 | Treatment and management of                      | V - mental health | Drugs (not prophylactic |

## Appendix1: List of identified healthcare technologies

|                      |                 |                                                                                                                                                               |    |                                                  |                        |                                   |
|----------------------|-----------------|---------------------------------------------------------------------------------------------------------------------------------------------------------------|----|--------------------------------------------------|------------------------|-----------------------------------|
|                      |                 | efficacy for enhancing cognitive performance                                                                                                                  |    | symptoms and disease                             |                        | vaccines)                         |
| Loveridge et al 1998 | Policy planning | 50% of patients presenting with mental illness such as schizophrenia and depression are diagnosed using objective genetic, biochemical or biophysical tests   | 21 | Diagnosis and monitoring of disease              | V - mental health      | Diagnostic tests and imaging      |
| Loveridge et al 1998 | Policy planning | 50% of surgical interventions carried out by minimum-access technique                                                                                         | 21 | Treatment and management of symptoms and disease | Other - generic        | Therapeutic procedures            |
| Loveridge et al 1998 | Policy planning | 10% of surgical interventions are carried out by robotic techniques                                                                                           | 21 | Treatment and management of symptoms and disease | Other - generic        | Therapeutic procedures            |
| Loveridge et al 1998 | Policy planning | Development of biocompatible materials for implants which elicit the required host response (e.g. non-thrombogenic or stimulation of host repair mechanisms). | 21 | Treatment and management of symptoms and disease | Other - generic        | Devices and biomaterials          |
| Loveridge et al 1998 | Policy planning | Widespread use for skin replacemt and/or repair of reliable products based on tissue engineering                                                              | 21 | Treatment and management of symptoms and disease | XII - skin             | Regenerative medicine             |
| Loveridge et al 1998 | Policy planning | Practical availability for regular clinical use of functional human organ tissue for kidney, liver or pancreas                                                | 21 | Treatment and management of symptoms and disease | Other - generic        | Regenerative medicine             |
| Loveridge et al 1998 | Policy planning | Widespread use of non-surgical (eg. by                                                                                                                        | 21 | Health promotion and prevention of disease       | XXI - screening, rehab | Drugs (not prophylactic vaccines) |

## Appendix1: List of identified healthcare technologies

|                      |                 |                                                                                                                                                                      |    |                                                                         |                        |                                   |
|----------------------|-----------------|----------------------------------------------------------------------------------------------------------------------------------------------------------------------|----|-------------------------------------------------------------------------|------------------------|-----------------------------------|
|                      |                 | vaccination) single application<br>contraception<br>offering lifetime control                                                                                        |    |                                                                         |                        |                                   |
| Loveridge et al 1998 | Policy planning | 50% of contraception involving pharmacological or vaccine methods resides with men                                                                                   | 21 | Health promotion and prevention of disease                              | XXI - screening, rehab | Drugs (not prophylactic vaccines) |
| Loveridge et al 1998 | Policy planning | 50% of diagnostic and treatment decisions involve use of expert systems                                                                                              | 21 | Supporting patients receiving care (designed to be used by individuals) | Other - generic        | IT systems, eHealth and mHealth   |
| Loveridge et al 1998 | Policy planning | 20% of time spent by doctors in primary care screening is replaced by patient interaction with experts systems                                                       | 21 | Supporting patients receiving care (designed to be used by individuals) | Other - generic        | IT systems, eHealth and mHealth   |
| Loveridge et al 1998 | Policy planning | Practical use of remote electronic systems which substitute human labour in monitoring the physical parameter of elderly and people with disability in the community | 21 | Supporting patients receiving care (designed to be used by individuals) | Other - generic        | IT systems, eHealth and mHealth   |
| Loveridge et al 1998 | Policy planning | Widespread use of unified and standardised electronic data collection systems and data informats for medical records                                                 | 21 | Supporting the provision of care and/or increasing service efficiency   | Other - generic        | IT systems, eHealth and mHealth   |
| Loveridge et al 1998 | Policy planning | At least 50% of health care centres (hospitals, clinic,etc) are connected to national information                                                                    | 21 | Supporting the provision of care and/or increasing service efficiency   | Other - generic        | IT systems, eHealth and mHealth   |



## Appendix1: List of identified healthcare technologies

|                      |                 |                                                                                                                                                                                                 |    |                                                                       |                        |                                 |
|----------------------|-----------------|-------------------------------------------------------------------------------------------------------------------------------------------------------------------------------------------------|----|-----------------------------------------------------------------------|------------------------|---------------------------------|
|                      |                 | electronic networks for patient records and information on diagnosis, treatment and outcome                                                                                                     |    |                                                                       |                        |                                 |
| Loveridge et al 1998 | Policy planning | Widespread use in health care of electronic information systems which span existing professional and organisational boundaries (health, social service, housing etc)                            | 21 | Supporting the provision of care and/or increasing service efficiency | Other - generic        | IT systems, eHealth and mHealth |
| Loveridge et al 1998 | Policy planning | Improved understanding of the role of gene-environment interactions in causing common structural birth defects (e.g. cleft palate) permits the implementation of primary preventable programmes | 21 | Health promotion and prevention of disease                            | XXI - screening, rehab | Population programmes           |
| Loveridge et al 1998 | Policy planning | Understanding how environmental factors encountered in early life cause adult disease leads to national standards for diet and lifestyle in pre-natal and early life                            | 21 | Health promotion and prevention of disease                            | XXI - screening, rehab | Population programmes           |
| Loveridge et al 1998 | Policy planning | Widespread use of financial inducements by national and private health insurers or similar bodies to adopt                                                                                      | 21 | Health promotion and prevention of disease                            | Other - generic        | Organisational programmes       |

## Appendix1: List of identified healthcare technologies

|                                                                      |                 |                                                                                                                                                             |    |                                                                         |                 |                              |
|----------------------------------------------------------------------|-----------------|-------------------------------------------------------------------------------------------------------------------------------------------------------------|----|-------------------------------------------------------------------------|-----------------|------------------------------|
|                                                                      |                 | healthier lifestyle or diets                                                                                                                                |    |                                                                         |                 |                              |
| Loveridge et al 1998                                                 | Policy planning | The causes of the rising prevalence of asthma are elucidated and action based on this knowledge leads to a 50% reduction in the incidence of severe disease | 21 | Health promotion and prevention of disease                              | X - respiratory | Population programmes        |
| Operating theatre of the year 2010; Department of Trade and Industry | Policy planning | X-ray replaced by Magnetic Resonance Imaging (MRI)                                                                                                          | 14 | Diagnosis and monitoring of disease                                     | Other - generic | Diagnostic tests and imaging |
| Operating theatre of the year 2010; Department of Trade and Industry | Policy planning | operating theatre of 2010 will be built with an ultra-open MRI system with parallel ultrasound facilities and complete optical capability                   | 14 | Supporting the provision of care and/or increasing service efficiency   | Other - generic | Medical equipment            |
| Operating theatre of the year 2010; Department of Trade and Industry | Policy planning | Endoscopes will reduce in size as fibres, lenses and electronic sensors get smaller,                                                                        | 14 | Supporting patients receiving care (designed to be used by individuals) | Other - generic | Devices and biomaterials     |
| Operating theatre of the year 2010; Department of Trade and Industry | Policy planning | CCD image sensors have the ability to see in both ultra-violet and near infra-red.                                                                          | 14 | Diagnosis and monitoring of disease                                     | Other - generic | Diagnostic tests and imaging |
| Operating theatre of the year 2010; Department of Trade and Industry | Policy planning | New magnetic sensing technologies will detect the configuration of the endoscope and accessory devices inside the patient.                                  | 14 | Supporting patients receiving care (designed to be used by individuals) | Other - generic | Devices and biomaterials     |

## Appendix1: List of identified healthcare technologies

|                                                                      |                 |                                                                                                                                                              |    |                                                  |                 |                              |
|----------------------------------------------------------------------|-----------------|--------------------------------------------------------------------------------------------------------------------------------------------------------------|----|--------------------------------------------------|-----------------|------------------------------|
| Operating theatre of the year 2010; Department of Trade and Industry | Policy planning | Auto focus and zoom optical systems will be interfaced with 30 to take the endoscope imaging capability beyond what is currently possible with human vision. | 14 | Diagnosis and monitoring of disease              | Other - generic | Diagnostic tests and imaging |
| Operating theatre of the year 2010; Department of Trade and Industry | Policy planning | High resolution ultrasound in closer proximity to the tissue and structures to be studied                                                                    | 14 | Diagnosis and monitoring of disease              | Other - generic | Diagnostic tests and imaging |
| Operating theatre of the year 2010; Department of Trade and Industry | Policy planning | Laser induced fluorescence imaging systems for diagnosis of early malignant changes, monitoring and therapy will become available.                           | 14 | Diagnosis and monitoring of disease              | II - cancers    | Diagnostic tests and imaging |
| Operating theatre of the year 2010; Department of Trade and Industry | Policy planning | Near infra-red spectroscopy, for looking at tissue oxygenation state                                                                                         | 14 | Diagnosis and monitoring of disease              | Other - generic | Diagnostic tests and imaging |
| Operating theatre of the year 2010; Department of Trade and Industry | Policy planning | Confocal, or other optical, ultrasonic or magnetic resonance microscopy, for on-line histology of bulk samples                                               | 14 | Diagnosis and monitoring of disease              | Other - generic | Diagnostic tests and imaging |
| Operating theatre of the year 2010; Department of Trade and Industry | Policy planning | Minimal Access Surgery is likely to account for as much as 75% of surgical procedures                                                                        | 14 | Treatment and management of symptoms and disease | Other - generic | Therapeutic procedures       |
| Operating theatre of the year 2010; Department of Trade and Industry | Policy planning | Robotic camera holders are likely to become routine in laparoscopic procedures.                                                                              | 14 | Treatment and management of symptoms and disease | Other - generic | Medical equipment            |

## Appendix1: List of identified healthcare technologies

|                                                                      |                 |                                                                                                                                                                                          |    |                                                                       |                 |                      |
|----------------------------------------------------------------------|-----------------|------------------------------------------------------------------------------------------------------------------------------------------------------------------------------------------|----|-----------------------------------------------------------------------|-----------------|----------------------|
| Operating theatre of the year 2010; Department of Trade and Industry | Policy planning | The operating table's control system and the robotics system could become integrated in the future operating table.                                                                      | 14 | Supporting the provision of care and/or increasing service efficiency | Other - generic | Medical equipment    |
| Operating theatre of the year 2010; Department of Trade and Industry | Policy planning | Ability to ventilate all patients from neonates to adults                                                                                                                                | 14 | Treatment and management of symptoms and disease                      | X - respiratory | Non-surgical therapy |
| Operating theatre of the year 2010; Department of Trade and Industry | Policy planning | Control handsets will incorporate dot matrix displays which will give the operator information about the condition of the table, position of the top and warnings about possible hazards | 14 | Supporting the provision of care and/or increasing service efficiency | Other - generic | Medical equipment    |
| Operating theatre of the year 2010; Department of Trade and Industry | Policy planning | The operating table may have a built-in patient temperature regulation system.                                                                                                           | 14 | Supporting the provision of care and/or increasing service efficiency | Other - generic | Medical equipment    |
| Operating theatre of the year 2010; Department of Trade and Industry | Policy planning | Connection between the Operating Room and the Anaesthetic machine in the Control Room will be via the Anaesthetist in the Operating Room.                                                | 14 | Supporting the provision of care and/or increasing service efficiency | Other - generic | Medical equipment    |
| Operating theatre of the year 2010; Department of Trade and Industry | Policy planning | The Anaesthetic machine will incorporate both inhalation agent vaporisation and multi-drug infusion systems These devices will be electronically integrated into the monitoring          | 14 | Supporting the provision of care and/or increasing service efficiency | Other - generic | Medical equipment    |

## Appendix1: List of identified healthcare technologies

|                                                                      |                 |                                                                                                                                                                                                                                                                    |    |                                                                         |                 |                                 |
|----------------------------------------------------------------------|-----------------|--------------------------------------------------------------------------------------------------------------------------------------------------------------------------------------------------------------------------------------------------------------------|----|-------------------------------------------------------------------------|-----------------|---------------------------------|
|                                                                      |                 | and information management and anaesthetic record keeping system so that vaporiser concentration settings and infusion rates will be continuously recorded                                                                                                         |    |                                                                         |                 |                                 |
| Operating theatre of the year 2010; Department of Trade and Industry | Policy planning | Mechanical flow-meters will be replaced by electronic gas mixing systems                                                                                                                                                                                           | 14 | Supporting the provision of care and/or increasing service efficiency   | Other - generic | Medical equipment               |
| Operating theatre of the year 2010; Department of Trade and Industry | Policy planning | Patient monitoring will be very simple and intuitive probably touch screen and quite possibly voice activation.                                                                                                                                                    | 14 | Supporting patients receiving care (designed to be used by individuals) | Other - generic | IT systems, eHealth and mHealth |
| Operating theatre of the year 2010; Department of Trade and Industry | Policy planning | Monitors will also network into central areas outside the operating theatre so that, for example, anaesthetics being delivered by less experienced staff can be monitored remotely.                                                                                | 14 | Supporting patients receiving care (designed to be used by individuals) | Other - generic | IT systems, eHealth and mHealth |
| Operating theatre of the year 2010; Department of Trade and Industry | Policy planning | The operation room will capture the data from one or perhaps two small 'wireless' sensors placed on the body that will provide pulse oxymetry CO <sub>2</sub> , ECG and other key parameter data and then transmit them to the monitor via radio or IR technology. | 14 | Supporting patients receiving care (designed to be used by individuals) | Other - generic | IT systems, eHealth and mHealth |

## Appendix1: List of identified healthcare technologies

|                                                                      |                 |                                                                                                                                                                                                                                              |    |                                                                         |                 |                                 |
|----------------------------------------------------------------------|-----------------|----------------------------------------------------------------------------------------------------------------------------------------------------------------------------------------------------------------------------------------------|----|-------------------------------------------------------------------------|-----------------|---------------------------------|
| Operating theatre of the year 2010; Department of Trade and Industry | Policy planning | Patient will be equipped with a belt (or other suitable garment) into which all monitoring and feed lines will be terminated, and which will include significant active capability. Drip and other lines will also be terminated in the belt | 14 | Supporting patients receiving care (designed to be used by individuals) | Other - generic | Devices and biomaterials        |
| Operating theatre of the year 2010; Department of Trade and Industry | Policy planning | Patient can be "plugged" into electrical support, monitoring and stimulation as well as fluid and chemical agents using a single connector to facilitate transfer of patient from one ward to another or from the operation theatre          | 14 | Supporting patients receiving care (designed to be used by individuals) | Other - generic | IT systems, eHealth and mHealth |
| Operating theatre of the year 2010; Department of Trade and Industry | Policy planning | Operation lamp will be replaced by a better light source                                                                                                                                                                                     | 14 | Supporting the provision of care and/or increasing service efficiency   | Other - generic | Medical equipment               |
| Operating theatre of the year 2010; Department of Trade and Industry | Policy planning | Automatic control of light pattern in the operation theatre                                                                                                                                                                                  | 14 | Supporting the provision of care and/or increasing service efficiency   | Other - generic | Medical equipment               |
| Operating theatre of the year 2010; Department of Trade and Industry | Policy planning | The operating lamp of the future is likely to use much more electronics to accurately control the voltage, dimming, focus, tracking and to limit maximum light intensity to                                                                  | 14 | Supporting the provision of care and/or increasing service efficiency   | Other - generic | Medical equipment               |

## Appendix1: List of identified healthcare technologies

|                                                                      |                 |                                                                                                                                                                           |    |                                                                       |                              |                                 |
|----------------------------------------------------------------------|-----------------|---------------------------------------------------------------------------------------------------------------------------------------------------------------------------|----|-----------------------------------------------------------------------|------------------------------|---------------------------------|
|                                                                      |                 | safe levels.                                                                                                                                                              |    |                                                                       |                              |                                 |
| Operating theatre of the year 2010; Department of Trade and Industry | Policy planning | The operating lamps of the future will be sealed for easy disinfection                                                                                                    | 14 | Supporting the provision of care and/or increasing service efficiency | Other - generic              | Medical equipment               |
| Operating theatre of the year 2010; Department of Trade and Industry | Policy planning | Telemedicine                                                                                                                                                              | 14 | Unknown                                                               | Other - generic              | IT systems, eHealth and mHealth |
| Operating theatre of the year 2010; Department of Trade and Industry | Policy planning | Telemonitoring                                                                                                                                                            | 14 | Supporting the provision of care and/or increasing service efficiency | Other - generic              | IT systems, eHealth and mHealth |
| Operating theatre of the year 2010; Department of Trade and Industry | Policy planning | Teleconsultation                                                                                                                                                          | 14 | Supporting the provision of care and/or increasing service efficiency | Other - generic              | IT systems, eHealth and mHealth |
| Operating theatre of the year 2010; Department of Trade and Industry | Policy planning | Telesurgery for demonstration or teaching                                                                                                                                 | 14 | Supporting the provision of care and/or increasing service efficiency | Other - generic              | IT systems, eHealth and mHealth |
| Operating theatre of the year 2010; Department of Trade and Industry | Policy planning | Minimal access surgery (MAS)                                                                                                                                              | 14 | Treatment and management of symptoms and disease                      | Other - generic              | Therapeutic procedures          |
| Operating theatre of the year 2010; Department of Trade and Industry | Policy planning | Systems in which as much of the patient's own blood is recovered and recycled as possible.                                                                                | 14 | Treatment and management of symptoms and disease                      | III - blood                  | Non-surgical therapy            |
| Operating theatre of the year 2010; Department of Trade and Industry | Policy planning | Use of flexible endoscope technology to allow surgeons to see around and behind structures, giving the surgeon greater access and the patient a greater degree of safety. | 14 | Treatment and management of symptoms and disease                      | XI - GI tract, dental health | Devices and biomaterials        |

## Appendix1: List of identified healthcare technologies

|                                                                      |                 |                                                                                                                                                                                                                                                         |    |                                                                       |                 |                                 |
|----------------------------------------------------------------------|-----------------|---------------------------------------------------------------------------------------------------------------------------------------------------------------------------------------------------------------------------------------------------------|----|-----------------------------------------------------------------------|-----------------|---------------------------------|
| Operating theatre of the year 2010; Department of Trade and Industry | Policy planning | A move away from the use of X-rays and image intensification towards more mobile methods of MRI scanning.                                                                                                                                               | 14 | Diagnosis and monitoring of disease                                   | Other - generic | Diagnostic tests and imaging    |
| Operating theatre of the year 2010; Department of Trade and Industry | Policy planning | Developments in the use of laser and particularly electrosurgery                                                                                                                                                                                        | 14 | Treatment and management of symptoms and disease                      | Other - generic | Therapeutic procedures          |
| Operating theatre of the year 2010; Department of Trade and Industry | Policy planning | Use of robotics and head up display allowing surgeon sitting in a control room rather than being in the theatre with the patient                                                                                                                        | 14 | Supporting the provision of care and/or increasing service efficiency | Other - generic | Medical equipment               |
| Operating theatre of the year 2010; Department of Trade and Industry | Policy planning | Coding will be used to associate patient, operating procedure (and so appropriate tools and drugs), support facilities and to generate automatic records of usage.                                                                                      | 14 | Supporting the provision of care and/or increasing service efficiency | Other - generic | IT systems, eHealth and mHealth |
| Operating theatre of the year 2010; Department of Trade and Industry | Policy planning | Tools and devices for a procedure will be located in a carousel analogous to that for a computer numerically controlled machine tool. This will allow the surgeon to present his tool holder to it, have the old tool extracted and a new one inserted. | 14 | Supporting the provision of care and/or increasing service efficiency | Other - generic | Medical equipment               |
| Operating theatre of the year 2010; Department of Trade and Industry | Policy planning | Robots will be used as transport vehicles both within the operating room                                                                                                                                                                                | 14 | Supporting the provision of care and/or increasing service efficiency | Other - generic | Medical equipment               |



## Appendix1: List of identified healthcare technologies

|                                                                      |                 |                                                                                                                                                                                                                       |    |                                                                         |                        |                        |
|----------------------------------------------------------------------|-----------------|-----------------------------------------------------------------------------------------------------------------------------------------------------------------------------------------------------------------------|----|-------------------------------------------------------------------------|------------------------|------------------------|
|                                                                      |                 | and for the surrounding support areas                                                                                                                                                                                 |    |                                                                         |                        |                        |
| Operating theatre of the year 2010; Department of Trade and Industry | Policy planning | Robots will carry out very precise procedures controlled by the surgeon from a distance,                                                                                                                              | 14 | Supporting patients receiving care (designed to be used by individuals) | Other - generic        | Medical equipment      |
| Operating theatre of the year 2010; Department of Trade and Industry | Policy planning | Joint replacement be performed robotically                                                                                                                                                                            | 14 | Treatment and management of symptoms and disease                        | XIII - musculoskeletal | Therapeutic procedures |
| Operating theatre of the year 2010; Department of Trade and Industry | Policy planning | The operation theatre may be controlled by a robot "software" box that will respond to voice recognition of the surgeon and change factors such as the heating of the theatre, the lighting and position of the table | 14 | Supporting the provision of care and/or increasing service efficiency   | Other - generic        | Medical equipment      |
| Operating theatre of the year 2010; Department of Trade and Industry | Policy planning | A robot would be able to transfer sterile instrument trays from a central sterile store to the surgeon at the operating table.                                                                                        | 14 | Supporting the provision of care and/or increasing service efficiency   | Other - generic        | Medical equipment      |
| Operating theatre of the year 2010; Department of Trade and Industry | Policy planning | Transport Robots could be used in the supply and disposal functions outside the operating room within the operating suite                                                                                             | 14 | Supporting the provision of care and/or increasing service efficiency   | Other - generic        | Medical equipment      |
| Operating theatre of the year 2010; Department of Trade and Industry | Policy planning | Robots will be used in moving patients from ward to theatre areas (to replace the use of porters)                                                                                                                     | 14 | Supporting the provision of care and/or increasing service efficiency   | Other - generic        | Medical equipment      |

## Appendix1: List of identified healthcare technologies

|                                                                      |                 |                                                                                                                                                                                                                            |    |                                                                         |                 |                   |
|----------------------------------------------------------------------|-----------------|----------------------------------------------------------------------------------------------------------------------------------------------------------------------------------------------------------------------------|----|-------------------------------------------------------------------------|-----------------|-------------------|
| Operating theatre of the year 2010; Department of Trade and Industry | Policy planning | Using dedicated robot trucks similar to the supply trucks, waste could be collected on a regular basis from each theatre and taken to an automatic local waste reduction/ disposal facility adjacent to the theatre suite. | 14 | Supporting the provision of care and/or increasing service efficiency   | Other - generic | Medical equipment |
| Operating theatre of the year 2010; Department of Trade and Industry | Policy planning | Disposal of hospital material could be performed on site with the use of machines such as "needle eaters"                                                                                                                  | 14 | Supporting the provision of care and/or increasing service efficiency   | Other - generic | Medical equipment |
| Operating theatre of the year 2010; Department of Trade and Industry | Policy planning | Bulky X-Ray machines will probably be a thing of the past and replaced by computerised radiology                                                                                                                           | 14 | Diagnosis and monitoring of disease                                     | Other - generic | Medical equipment |
| Operating theatre of the year 2010; Department of Trade and Industry | Policy planning | A central control room, with visual links to each theatre served, could house all of the equipment.                                                                                                                        | 14 | Supporting the provision of care and/or increasing service efficiency   | Other - generic | Medical equipment |
| Operating theatre of the year 2010; Department of Trade and Industry | Policy planning | All theatres could be designed with ultra-clean ventilation systems or an adapted containment system to reduce the risk of the spread of infection                                                                         | 14 | Health promotion and prevention of disease                              | I - infections  | Medical equipment |
| Operating theatre of the year 2010; Department of Trade and Industry | Policy planning | Patients identification bracelets could be coded and bar checked as they moved through                                                                                                                                     | 14 | Supporting patients receiving care (designed to be used by individuals) | Other - generic | Medical equipment |

## Appendix1: List of identified healthcare technologies

|                                                                      |                 |                                                                                                                                                                                                                                                            |    |                                                                       |                 |                              |
|----------------------------------------------------------------------|-----------------|------------------------------------------------------------------------------------------------------------------------------------------------------------------------------------------------------------------------------------------------------------|----|-----------------------------------------------------------------------|-----------------|------------------------------|
|                                                                      |                 | the system so that their progress could be monitored at all times                                                                                                                                                                                          |    |                                                                       |                 |                              |
| Operating theatre of the year 2010; Department of Trade and Industry | Policy planning | Automated trolleys and doors that can be electronically controlled by robots                                                                                                                                                                               | 14 | Supporting the provision of care and/or increasing service efficiency | Other - generic | Medical equipment            |
| UK technology and innovation futures for the 2020s, 2010             | Policy planning | Further development of 3D imaging techniques.                                                                                                                                                                                                              | 10 | Diagnosis and monitoring of disease                                   | Other - generic | Diagnostic tests and imaging |
| UK technology and innovation futures for the 2020s, 2010             | Policy planning | Fluorescence assisted Resection and Exploration (FLARE) technologies, which combine both visible light imaging with near-infrared imaging of fluorescent biomarkers, can detect particular pathologies associated with tumours without the need for biopsy | 10 | Diagnosis and monitoring of disease                                   | Other - generic | Diagnostic tests and imaging |
| UK technology and innovation futures for the 2020s, 2010             | Policy planning | Colour X-ray or TEDDI imaging can be used to biopsy tissues by utilising scattered X-rays to build a spatially-resolved picture that can distinguish between different materials.                                                                          | 10 | Diagnosis and monitoring of disease                                   | Other - generic | Diagnostic tests and imaging |
| UK technology and innovation futures for the 2020s, 2010             | Policy planning | In vivo neuroimaging, both at the tissue and cellular level                                                                                                                                                                                                | 10 | Diagnosis and monitoring of disease                                   | Other - generic | Diagnostic tests and imaging |
| UK technology and innovation futures for the                         | Policy planning | Brain imaging techniques such as functional                                                                                                                                                                                                                | 10 | Diagnosis and monitoring of disease                                   | Other - generic | Diagnostic tests and imaging |

## Appendix1: List of identified healthcare technologies

|                                                          |                 |                                                                                                                                                                                                                     |    |                                                  |                 |                              |
|----------------------------------------------------------|-----------------|---------------------------------------------------------------------------------------------------------------------------------------------------------------------------------------------------------------------|----|--------------------------------------------------|-----------------|------------------------------|
| 2020s, 2010                                              |                 | magnetic resonance imaging (fMRI)                                                                                                                                                                                   |    |                                                  |                 |                              |
| UK technology and innovation futures for the 2020s, 2010 | Policy planning | Lab-on-a-Chip (LOC) devices integrate and scale-down biomedical and other analytical laboratory functions and processes to a miniaturised chip format.                                                              | 10 | Diagnosis and monitoring of disease              | Other - generic | Diagnostic tests and imaging |
| UK technology and innovation futures for the 2020s, 2010 | Policy planning | Nucleic acid probes and diagnostic microarray systems can detect the nucleic acid sequence or sequences that identify a specific infectious disease agent, human genetic disease or individual (DNA profiling).     | 10 | Diagnosis and monitoring of disease              | Other - generic | Diagnostic tests and imaging |
| UK technology and innovation futures for the 2020s, 2010 | Policy planning | A new focus on single-stranded DNA, micro RNA (miRNA) and double-stranded RNA (dsRNA) technologies as therapeutics may lead to clinically-approved interventions for gene therapy and treatment of medical disease. | 10 | Treatment and management of symptoms and disease | Other - generic | Regenerative medicine        |
| UK technology and innovation futures for the 2020s, 2010 | Policy planning | RNA interference (RNAi) may lead to new treatments.                                                                                                                                                                 | 10 | Treatment and management of symptoms and disease | Other - generic | Regenerative medicine        |
| UK technology and innovation futures for the 2020s, 2010 | Policy planning | Viruses, bacteria or yeasts may be able to act as carriers for new sequences of DNA                                                                                                                                 | 10 | Treatment and management of symptoms and disease | Other - generic | Regenerative medicine        |

## Appendix1: List of identified healthcare technologies

|                                                          |                 |                                                                                                                                                                                                                                     |    |                                                  |                   |                                   |
|----------------------------------------------------------|-----------------|-------------------------------------------------------------------------------------------------------------------------------------------------------------------------------------------------------------------------------------|----|--------------------------------------------------|-------------------|-----------------------------------|
| UK technology and innovation futures for the 2020s, 2010 | Policy planning | Increased understanding of individual sensitivities to drugs                                                                                                                                                                        | 10 | Diagnosis and monitoring of disease              | III - blood       | Drugs (not prophylactic vaccines) |
| UK technology and innovation futures for the 2020s, 2010 | Policy planning | DNA vaccines for AIDS, malaria, hepatitis B and certain cancers may be available within 10 years                                                                                                                                    | 10 | Health promotion and prevention of disease       | Other - generic   | Prophylactic vaccines             |
| UK technology and innovation futures for the 2020s, 2010 | Policy planning | New treatments for neurodegenerative conditions such as dementia.                                                                                                                                                                   | 10 | Treatment and management of symptoms and disease | VI - nervous      | Unknown                           |
| UK technology and innovation futures for the 2020s, 2010 | Policy planning | 'Cognition enhancers'; substances that enhance the performance of our brain in specific ways, such as improving short-term memory and increasing our speed of thought enhancement through lifestyle drugs may will become the norm. | 10 | Treatment and management of symptoms and disease | VI - nervous      | Drugs (not prophylactic vaccines) |
| UK technology and innovation futures for the 2020s, 2010 | Policy planning | 'Emoticeuticals', drugs that act by changing hormone levels in the body, may mediate our responses in our private lives and work.                                                                                                   | 10 | Treatment and management of symptoms and disease | V - mental health | Drugs (not prophylactic vaccines) |
| UK technology and innovation futures for the 2020s, 2010 | Policy planning | Sensoceuticals' might enhance pleasure by restoring or accentuating the senses.                                                                                                                                                     | 10 | Treatment and management of symptoms and disease | Other - generic   | Drugs (not prophylactic vaccines) |
| UK technology and innovation futures for the 2020s, 2010 | Policy planning | The advent of a drug that mimics the positive effects of alcohol                                                                                                                                                                    | 10 | Health promotion and prevention of disease       | V - mental health | Drugs (not prophylactic vaccines) |

## Appendix1: List of identified healthcare technologies

|                                                          |                 |                                                                                                                                                                                                                                    |    |                                                  |                              |                                   |
|----------------------------------------------------------|-----------------|------------------------------------------------------------------------------------------------------------------------------------------------------------------------------------------------------------------------------------|----|--------------------------------------------------|------------------------------|-----------------------------------|
|                                                          |                 | with none of its drawbacks.                                                                                                                                                                                                        |    |                                                  |                              |                                   |
| UK technology and innovation futures for the 2020s, 2010 | Policy planning | Stem cells replacing malfunctioning liver cells or even growing entire livers to replace diseased ones                                                                                                                             | 10 | Treatment and management of symptoms and disease | XI - GI tract, dental health | Regenerative medicine             |
| UK technology and innovation futures for the 2020s, 2010 | Policy planning | Stem cells giving new neurons to those with brain damage                                                                                                                                                                           | 10 | Treatment and management of symptoms and disease | VI - nervous                 | Regenerative medicine             |
| UK technology and innovation futures for the 2020s, 2010 | Policy planning | Stem cells giving new heart cells to those with heart disease                                                                                                                                                                      | 10 | Treatment and management of symptoms and disease | IX - circulation             | Regenerative medicine             |
| UK technology and innovation futures for the 2020s, 2010 | Policy planning | Stem cells giving therapies for Parkinson's and Alzheimer's diseases                                                                                                                                                               | 10 | Treatment and management of symptoms and disease | VI - nervous                 | Regenerative medicine             |
| UK technology and innovation futures for the 2020s, 2010 | Policy planning | Stem cells giving therapies for spinal cord injury, stroke, cancer, burns, cardiovascular disease, diabetes, osteoarthritis and rheumatoid arthritis; as well as furnishing an endless supply of red blood cells for transfusions. | 10 | Treatment and management of symptoms and disease | Other - generic              | Regenerative medicine             |
| UK technology and innovation futures for the 2020s, 2010 | Policy planning | Development of a cheap anti-malarial drug.                                                                                                                                                                                         | 10 | Treatment and management of symptoms and disease | I - infections               | Drugs (not prophylactic vaccines) |
| UK technology and innovation futures for the 2020s, 2010 | Policy planning | Programming a bacterium or virus that can identify malignant cells and can deliver a therapeutic agent could have major benefits for treating cancer and similar illnesses                                                         | 10 | Treatment and management of symptoms and disease | II - cancers                 | Regenerative medicine             |

## Appendix1: List of identified healthcare technologies

|                                                          |                 |                                                                                                                                                     |    |                                                  |                 |                                   |
|----------------------------------------------------------|-----------------|-----------------------------------------------------------------------------------------------------------------------------------------------------|----|--------------------------------------------------|-----------------|-----------------------------------|
| UK technology and innovation futures for the 2020s, 2010 | Policy planning | Stratified medicine: it will become increasingly possible to analyse an individual for certain biomarkers to determine the best course of treatment | 10 | Diagnosis and monitoring of disease              | Other - generic | Diagnostic tests and imaging      |
| UK technology and innovation futures for the 2020s, 2010 | Policy planning | Personalised medicine                                                                                                                               | 10 | Treatment and management of symptoms and disease | Other - generic | Drugs (not prophylactic vaccines) |
| UK technology and innovation futures for the 2020s, 2010 | Policy planning | In-situ tissue regeneration: Material is implanted directly in the body and regenerates the tissue over time as the material degrades.              | 10 | Treatment and management of symptoms and disease | Other - generic | Regenerative medicine             |
| UK technology and innovation futures for the 2020s, 2010 | Policy planning | Tissue engineering: Material can act as temporary scaffold for cell culture and tissue growth in vitro                                              | 10 | Treatment and management of symptoms and disease | Other - generic | Regenerative medicine             |
| UK technology and innovation futures for the 2020s, 2010 | Policy planning | Micro-masonry and 3D organ printing techniques                                                                                                      | 10 | Treatment and management of symptoms and disease | Other - generic | Regenerative medicine             |
| UK technology and innovation futures for the 2020s, 2010 | Policy planning | Brain Computer Interface                                                                                                                            | 10 | Rehabilitation                                   | Other - generic | Devices and biomaterials          |
| UK technology and innovation futures for the 2020s, 2010 | Policy planning | Neuroprosthetics: the connection can occur between any part of the nervous system (such as peripheral nerves) and a device.                         | 10 | Rehabilitation                                   | VI - nervous    | Devices and biomaterials          |

## Appendix1: List of identified healthcare technologies

|                                                          |                 |                                                                                                                                                                |    |                                                                         |                        |                              |
|----------------------------------------------------------|-----------------|----------------------------------------------------------------------------------------------------------------------------------------------------------------|----|-------------------------------------------------------------------------|------------------------|------------------------------|
| UK technology and innovation futures for the 2020s, 2010 | Policy planning | Magnetoencephalography (MEG): maps brain activity by recording the magnetic fields produced by electrical currents occurring in the brain                      | 10 | Diagnosis and monitoring of disease                                     | VI - nervous           | Diagnostic tests and imaging |
| UK technology and innovation futures for the 2020s, 2010 | Policy planning | functional magnetic imaging (fMRI) – involves measuring changes in blood flow related to neural activity in the brain.                                         | 10 | Diagnosis and monitoring of disease                                     | VI - nervous           | Diagnostic tests and imaging |
| UK technology and innovation futures for the 2020s, 2010 | Policy planning | functional Near-Infrared Spectroscopy (fNIRS) for optical topography                                                                                           | 10 | Diagnosis and monitoring of disease                                     | Other - generic        | Diagnostic tests and imaging |
| UK technology and innovation futures for the 2020s, 2010 | Policy planning | Electrocorticography (EoCG), measure the electrical activity of the brain using electrodes which are implanted inside the skull, but outside the brain tissue. | 10 | Diagnosis and monitoring of disease                                     | VI - nervous           | Diagnostic tests and imaging |
| UK technology and innovation futures for the 2020s, 2010 | Policy planning | Implanted brain chips for controlling computers                                                                                                                | 10 | Rehabilitation                                                          | XXI - screening, rehab | Devices and biomaterials     |
| UK technology and innovation futures for the 2020s, 2010 | Policy planning | Neural prosthetics replace lost limbs                                                                                                                          | 5  | Rehabilitation                                                          | XXI - screening, rehab | Devices and biomaterials     |
| UK technology and innovation futures for the 2020s, 2010 | Policy planning | Thought-controlled robots for personal healthcare                                                                                                              | 10 | Supporting patients receiving care (designed to be used by individuals) | Other - generic        | Medical equipment            |
| UK technology and innovation futures for the 2020s, 2010 | Policy planning | Thought-controlled wheelchairs                                                                                                                                 | 10 | Rehabilitation                                                          | XXI - screening, rehab | Medical equipment            |



## Appendix1: List of identified healthcare technologies

|                                                          |                 |                                                                                                                                                                                                                                                    |    |                                                                         |                 |                                   |
|----------------------------------------------------------|-----------------|----------------------------------------------------------------------------------------------------------------------------------------------------------------------------------------------------------------------------------------------------|----|-------------------------------------------------------------------------|-----------------|-----------------------------------|
| UK technology and innovation futures for the 2020s, 2010 | Policy planning | ehealth: Examples include health information networks, electronic health records, tele-medicine services, personal wearable and portable mobile devices, health portals and other tools that assist in health monitoring, diagnosis and treatment. | 10 | Supporting the provision of care and/or increasing service efficiency   | Other - generic | IT systems, eHealth and mHealth   |
| UK technology and innovation futures for the 2020s, 2010 | Policy planning | Lab-on-a-chip technologies could also bring diagnostics down to a personal scale, where patients can test themselves and transmit data electronically for analysis and treatment.                                                                  | 10 | Supporting patients receiving care (designed to be used by individuals) | Other - generic | IT systems, eHealth and mHealth   |
| UK technology and innovation futures for the 2020s, 2010 | Policy planning | Tailored Medicine                                                                                                                                                                                                                                  | 10 | Treatment and management of symptoms and disease                        | Other - generic | Drugs (not prophylactic vaccines) |
| Technology foresight towards 2020_China                  | Policy planning | The anti-viral medicine with highly efficiency applies to clinical medicine widely                                                                                                                                                                 | 17 | Treatment and management of symptoms and disease                        | I - infections  | Drugs (not prophylactic vaccines) |
| Technology foresight towards 2020_China                  | Policy planning | standardized safe evaluation system which include the technology for monitoring and examination of trans-gene biology will be established;                                                                                                         | 17 | Supporting the provision of care and/or increasing service efficiency   | Other - generic | Organisational programmes         |
